# Supplementary material for: Feasibility of data linkage in the PARAMEDIC trial: a cluster randomised trial of mechanical chest compression in out-of-hospital cardiac arrest
Source: PubMed Central journal article supplement (PMC6067361; doi:10.1136/bmjopen-2018-021519), 2018-07-28
Supplement: bmjopen-2018-021519.draft_revisions.pdf [file bmjopen-2018-021519.draft_revisions.pdf]

# BMJ Open

BMJ Open is committed to open peer review. As part of this commitment we make the peer review history of every article we publish publicly available.

When an article is published we post the peer reviewers' comments and the authors' responses online. We also post the versions of the paper that were used during peer review. These are the versions that the peer review comments apply to.

The versions of the paper that follow are the versions that were submitted during the peer review process. They are not the versions of record or the final published versions. They should not be cited or distributed as the published version of this manuscript.

BMJ Open is an open access journal and the full, final, typeset and author-corrected version of record of the manuscript is available on our site with no access controls, subscription charges or pay-per-view fees (<http://bmjopen.bmj.com>).

If you have any questions on BMJ Open's open peer review process please email [info.bmjopen@bmj.com](mailto:info.bmjopen@bmj.com)

# BMJ Open

## Feasibility of data linkage in the PARAMEDIC Trial: a cluster randomised trial of mechanical chest compression in out of hospital cardiac arrest

|                               |                                                                                                                                                                                                                                                                                                                                                                                                                                                                                                                                                                                                                                                                                                                                                                                                                                                                                                                                                                                                                                                                                                                                       |
|-------------------------------|---------------------------------------------------------------------------------------------------------------------------------------------------------------------------------------------------------------------------------------------------------------------------------------------------------------------------------------------------------------------------------------------------------------------------------------------------------------------------------------------------------------------------------------------------------------------------------------------------------------------------------------------------------------------------------------------------------------------------------------------------------------------------------------------------------------------------------------------------------------------------------------------------------------------------------------------------------------------------------------------------------------------------------------------------------------------------------------------------------------------------------------|
| Journal:                      | <i>BMJ Open</i>                                                                                                                                                                                                                                                                                                                                                                                                                                                                                                                                                                                                                                                                                                                                                                                                                                                                                                                                                                                                                                                                                                                       |
| Manuscript ID                 | bmjopen-2018-021519                                                                                                                                                                                                                                                                                                                                                                                                                                                                                                                                                                                                                                                                                                                                                                                                                                                                                                                                                                                                                                                                                                                   |
| Article Type:                 | Research                                                                                                                                                                                                                                                                                                                                                                                                                                                                                                                                                                                                                                                                                                                                                                                                                                                                                                                                                                                                                                                                                                                              |
| Date Submitted by the Author: | 11-Jan-2018                                                                                                                                                                                                                                                                                                                                                                                                                                                                                                                                                                                                                                                                                                                                                                                                                                                                                                                                                                                                                                                                                                                           |
| Complete List of Authors:     | Ji, Chen; University of Warwick, Warwick Clinical Trials Unit<br>Quinn, Tom; St George's University of London & Kingston University, Faculty of Health, Social Care & Education<br>Gavalova, Lucia; St George's University of London & Kingston University, Faculty of Health, Social Care & Education<br>Lall, Ranjit; University of Warwick, Warwick Clinical Trials Unit<br>Scomparin, Charlotte; University of Warwick, Warwick Clinical Trials Unit<br>Horton, Jessica; University of Warwick, Warwick Clinical Trials Unit<br>Deakin, Charles; University Hospital Southampton NHS Foundation Trust, NIHR Southampton Respiratory Biomedical Research Unit<br>Pocock, Helen; South Central Ambulance Service NHS Foundation Trust<br>Smyth, Michael; University of Warwick, Warwick Clinical Trials Unit<br>Rees, Nigel; Welsh Ambulance Service NHS Trust<br>Brace-McDonnell, Samantha; University of Warwick, Warwick Clinical Trials Unit<br>Gates, Simon; University of Warwick, Warwick Clinical Trials Unit<br>Perkins, Gavin; University of Warwick, Warwick Clinical Trials Unit; Heart of England NHS Foundation Trust |
| Keywords:                     | Adult cardiology < CARDIOLOGY, Clinical trials < THERAPEUTICS, Data linkage, Cardiac arrest                                                                                                                                                                                                                                                                                                                                                                                                                                                                                                                                                                                                                                                                                                                                                                                                                                                                                                                                                                                                                                           |

SCHOLARONE™  
Manuscripts

1  
2  
3 **1 Feasibility of data linkage in the PARAMEDIC Trial: a cluster randomised trial of mechanical chest**  
4 **2 compression in out of hospital cardiac arrest.**  
5  
6  
7 **3**

8 4 Chen Ji<sup>1</sup> ([C.Ji.3@warwick.ac.uk](mailto:C.Ji.3@warwick.ac.uk))  
9

10 5 Tom Quinn<sup>2</sup> ([T.Quinn@sgul.kingston.ac.uk](mailto:T.Quinn@sgul.kingston.ac.uk))  
11

12 6 Lucia Gavalova<sup>2</sup> ([L.Gavalova@sgul.kingston.ac.uk](mailto:L.Gavalova@sgul.kingston.ac.uk))  
13

14 7 Ranjit Lall<sup>1</sup> ([R.Lall@warwick.ac.uk](mailto:R.Lall@warwick.ac.uk))  
15

16 8 Charlotte Scomparin<sup>1</sup> ([C.Scomparin@warwick.ac.uk](mailto:C.Scomparin@warwick.ac.uk))  
17

18 9 Jessica Horton<sup>1</sup> ([jessicahorton79@hotmail.com](mailto:jessicahorton79@hotmail.com))  
19

20 10 Charles D Deakin<sup>3,4</sup> ([charlesdeakin@doctors.org.uk](mailto:charlesdeakin@doctors.org.uk))  
21

22 11 Helen Pocock<sup>4</sup> ([Helen.Pocock1@nhs.net](mailto:Helen.Pocock1@nhs.net))  
23

24 12 Michael A Smyth<sup>1</sup> ([M.A.Smyth@warwick.ac.uk](mailto:M.A.Smyth@warwick.ac.uk))  
25

26 13 Nigel Rees<sup>5</sup> ([Nigel.Rees5@wales.nhs.uk](mailto:Nigel.Rees5@wales.nhs.uk))  
27

28 14 Samantha J Brace-McDonnell<sup>1,6</sup> ([S.Brace-Mcdonnell@warwick.ac.uk](mailto:S.Brace-Mcdonnell@warwick.ac.uk))  
29

30 15 Simon Gates<sup>1</sup> ([Simon.Gates@warwick.ac.uk](mailto:Simon.Gates@warwick.ac.uk))  
31

32 16 Gavin D Perkins<sup>1,6</sup> ([G.D.Perkins@warwick.ac.uk](mailto:G.D.Perkins@warwick.ac.uk))  
33  
34  
35  
36  
37

38 19 1. Warwick Clinical Trials Unit, University of Warwick, Coventry, UK  
39

40 20 2. Faculty of Health, Social Care and Education, Kingston University and St George's, University of  
41 21 London, London, UK  
42

43 22 3. NIHR Southampton Respiratory Biomedical Research Unit, University Hospital Southampton NHS  
44 23 Foundation Trust, Southampton, Hampshire, UK  
45

46 24 4. South Central Ambulance Service NHS Foundation Trust, Otterbourne, UK  
47

48 25 5. Welsh Ambulance Service NHS Trust, Cardiff, UK  
49

50 26 6. Heart of England NHS Foundation Trust, Birmingham, UK  
51  
52

53 **27 Correspondence to**

54  
55 28 Professor Gavin Perkins; University of Warwick, Tel: +44 (0)24761 50925;  
56 29 [G.D.Perkins@warwick.ac.uk](mailto:G.D.Perkins@warwick.ac.uk)  
57  
58  
59  
60

- 1
- 2
- 3 1 Word count
- 4
- 5 2 Abstract: 287
- 6
- 7 3 Main body: 3525 (excluding Tables/Figures/titles/notes/legends)
- 8
- 9
- 10
- 11
- 12
- 13
- 14
- 15
- 16
- 17
- 18
- 19
- 20
- 21
- 22
- 23
- 24
- 25
- 26
- 27
- 28
- 29
- 30
- 31
- 32
- 33
- 34
- 35
- 36
- 37
- 38
- 39
- 40
- 41
- 42
- 43
- 44
- 45
- 46
- 47
- 48
- 49
- 50
- 51
- 52
- 53
- 54
- 55
- 56
- 57
- 58
- 59
- 60

For peer review only

**Abstract**

*Objectives:* There is considerable interest in reducing the cost of clinical trials. Linkage of trial data to administrative datasets and disease-specific registries may improve trial efficiency, but has not been reported in resuscitation trials conducted in the UK. To assess the feasibility of utilising national administrative and clinical datasets to follow up patients transported to hospital following attempted resuscitation in a cluster randomised trial of a mechanical chest compression device in out of hospital cardiac arrest (OHCA).

*Methods:* Hospital data on trial participants were requested from Hospital Episode Statistics (HES); the Intensive Care National Audit and Research Centre (ICNARC); and Myocardial Ischaemia National Audit Project (MINAP) and National Audit of Percutaneous Coronary Intervention (NAPCI), using unique patient identifiers. Linked data were received between June 2014 and June 2015.

*Results:* Of 4471 patients randomised in the PARAMEDIC trial, 2398 (53.6%) were not known to be deceased at emergency department arrival and were eligible for linkage. We achieved an overall match rate of 86.7% in the combined HES A&E, inpatient and Critical care dataset, with variable match rates (4.2-80.4%) in individual datasets. No strong evidence of substantial bias was found in patient demographics, cardiac arrest related characteristics and major outcomes between HES matched and unmatched groups, in the linkage apart from location, response time and ROSC at handover.

*Conclusions:* This study shows that it is feasible to track patients from the pre-hospital setting through to hospital admission using routinely available administrative datasets with a moderate to high degree of success. This approach has the potential to complement the trial data with the demographic and clinical management information about the studied cohort, as well as to improve the efficiency and reduce the costs of follow-up in cardiac arrest trials.

*ISRCTN0833942.*

1  
2  
3 **1 Strengths and limitations of this study**  
4

- 5 2 • First study evaluating the supplement of routinely collected administrative data in a cardiac  
6 3 arrest trial in the UK.  
7 4 • Data linkage was made to different UK national registries.  
8 5 • The matching reliability was suboptimal due to relaxed matching criteria, matching method  
9 6 and possible data quality issues.  
10 7 • Routine data were not fully available for all trial patients transported to hospital.  
11 8 • The findings of our study are not generalisable to facilitate trial recruitment since it was  
12 9 considered unrealistic in the clinical context of cardiac arrest.  
13  
14  
15  
16 10

17  
18  
19  
20  
21  
22  
23  
24  
25  
26  
27  
28  
29  
30  
31  
32  
33  
34  
35  
36  
37  
38  
39  
40  
41  
42  
43  
44  
45  
46  
47  
48  
49  
50  
51  
52  
53  
54  
55  
56  
57  
58  
59  
60

For peer review only

## 1 **Background**

2 Well conducted and reported randomised controlled trials (RCTs) are considered the gold standard  
3 in evaluation of new or established clinical interventions. In cardiac arrest resuscitation science, only  
4 a small minority (1%) of contemporary international guideline recommendations are based on the  
5 highest level of evidence from more than one RCT, meta-analysis of high quality RCTs, or RCTs  
6 corroborated by high quality registry studies.<sup>1</sup> High quality trials to address outcomes of interest to  
7 patients following cardiac arrest (e.g. long term survival, neurocognitive status and disability)<sup>2</sup> are  
8 complex, labour intensive and expensive to perform. Many studies in cardiac arrest are therefore  
9 too small or inadequately conducted (with a predominance of observational studies which are prone  
10 to bias) to provide reliable estimates of treatment effect or harm to patients. Consequently, for the  
11 majority of resuscitation interventions, there is a paucity of high quality evidence. Funders (typically  
12 government agencies) have called for proposals for low-cost, more efficient trials.<sup>3</sup>

13 Traditional trial methods of patient tracking and data access in individual hospitals is challenging  
14 with limited resources. Cardiovascular medicine has attempted to improve the efficiency of the trial  
15 design by pioneering the concept of registry-based randomised trials, using clinical quality registries  
16 and administrative datasets. In the Thrombus Aspiration during ST-Segment Elevation Myocardial  
17 Infarction (TASTE) trial, undertaken in Sweden, both patient enrolment and follow up were  
18 conducted using the Swedish Web System for Enhancement and Development of Evidence-based  
19 Care in Heart Disease Evaluated According to Recommended Therapies (SWEDEHEART) registry.<sup>4</sup> On  
20 publication, this registry-based trial was hailed as the '*next disruptive technology*' in clinical research,  
21 and as a new clinical trial paradigm.<sup>5 6</sup> Subsequent registry-based trials have been reported in a  
22 comparison of radial versus femoral access in women undergoing percutaneous coronary  
23 intervention in the United States,<sup>7</sup> and of supplemental oxygen versus ambient air in patients with  
24 suspected acute myocardial infarction in Sweden.<sup>8</sup>

25 To our knowledge, however, there are no reports of registry-based randomised trials in resuscitation  
26 science. However, should accessing registry data to ascertain outcomes in a prehospital cardiac  
27 arrest trial (e.g. length of stay/patient pathways/survival status) to be feasible, this could be one way  
28 of significantly improving efficiency and reducing costs of conducting high quality randomised trials  
29 in resuscitation.

30 In the PARAMEDIC trial, the in-hospital data collection process was complex, expensive and labour  
31 intensive, with research paramedics visiting multiple hospitals across large geographical areas to  
32 extract data from hospital records. Patients transported to hospital following resuscitation from  
33 cardiac arrest follow multiple clinical pathways depending on their clinical status and treatments. As

1 hospital data are routinely collected and managed by national registries, utilising these registries  
 2 could save resources and time in the in-hospital data collection and potentially reduce the burden  
 3 on patients and relatives in the sensitive period following cardiac arrest.

4 This paper reports our assessment of the feasibility of linking data collected for the purposes of  
 5 patient follow up in a pragmatic, cluster randomised controlled trial of a mechanical chest  
 6 compression device undertaken in the United Kingdom (UK) prehospital setting, with large national  
 7 administrative and specialist registries.

## 8 **Methods**

9 The PARAMEDIC trial examined the effectiveness of LUCAS-2, a mechanical chest compression  
 10 device, in 4471 patients with out of hospital cardiac arrest (OHCA). The study was a cluster  
 11 randomised trial whereby emergency medical service (EMS) vehicles were randomised to carry the  
 12 LUCAS-2 device (intervention) or not (control). Full details of the trial protocol have been published  
 13 previously.<sup>9</sup> In summary, adults with OHCA where resuscitation was attempted by EMS personnel  
 14 and attended by a trial vehicle were included. Patients with traumatic cardiac arrest or suspected to  
 15 be pregnant were excluded. Trial recruitment ran from April 15, 2010 to June 10, 2013. We have  
 16 previously reported primary outcome (30-day survival),<sup>10</sup> secondary outcomes,<sup>11</sup> an economic  
 17 analysis<sup>12</sup> and characteristics of patients who were not resuscitated.<sup>13</sup>

### 18 *Data sources*

19 The PARAMEDIC trial utilised four sources of data that were linked to the trial dataset: UK National  
 20 Health Service (NHS) Hospital Episodes Statistics (HES), Myocardial Ischaemia National Audit Project  
 21 (MINAP),<sup>14</sup> National Audit of Percutaneous Coronary Interventions (NAPCI),<sup>15</sup> and Case Mix  
 22 Programme (CMP)<sup>16</sup> to obtain data on hospital stay and treatment or procedures that trial patients  
 23 received in hospital.

24 We used the MINAP, NAPCI and CMP data for the health economic analysis<sup>12</sup> and long-term post  
 25 admission outcomes<sup>11</sup> and to validate the hospital length of stay or stay in the intensive care  
 26 (secondary outcomes for the efficacy part of the trial), and also to gain insight into the specifics of  
 27 the treatment or procedures that trial patients received during their hospital stay. Characteristics of  
 28 the registries are summarised in Table 1.

29 Table 1: Characteristics of registries, participation and case ascertainment.

| Registry/Dataset | Source | Description | Participation and case ascertainment* during the trial period |
|------------------|--------|-------------|---------------------------------------------------------------|
|------------------|--------|-------------|---------------------------------------------------------------|



|                                                               |                                                                 |                                                                                                                                                                                                                                                                                |                                                                    |
|---------------------------------------------------------------|-----------------------------------------------------------------|--------------------------------------------------------------------------------------------------------------------------------------------------------------------------------------------------------------------------------------------------------------------------------|--------------------------------------------------------------------|
| Paramedic trial                                               | Warwick Clinical Trials Unit                                    | Trial patient cohort that survived admission to a hospital                                                                                                                                                                                                                     | n/a                                                                |
| Hospital Episode Statistics (HES)                             | NHS Digital (NHS D)                                             | Collection of information on all NHS hospital inpatients, Accident and Emergency (A&E), critical care and outpatients which enables health care providers to be paid according to their levels of activity.                                                                    | All hospitals<br>Case ascertainment 100%                           |
| Case Mix Programme (CMP)                                      | Intensive Care National Audit and Research Centre (ICNARC)      | Audit of patient outcomes from all adult, general critical care units in England, Wales and Northern Ireland. Other specialist units, including neurosciences, cardiac and high dependency units, also participate                                                             | Over 90% of critical care units<br>Case ascertainment not reported |
| Myocardial Ischaemia National Audit Project (MINAP)           | National Institute for Cardiovascular Outcomes Research (NICOR) | National audit of patients with acute coronary syndrome admitted to all hospitals in England, Wales and Northern Ireland. Data are collected prospectively at each hospital by secure electronic system, electronically encrypted and transferred online to a central database | All hospitals<br>Case ascertainment not reported                   |
| NAPCI (National Audit of Percutaneous Coronary Interventions) | National Institute for Cardiovascular Outcomes Research (NICOR) | National audit of all PCI procedures from NHS and non-NHS hospitals in the United Kingdom.                                                                                                                                                                                     | All hospitals<br>Case ascertainment 97%                            |

Note: \*: Case ascertainment – Rate (e.g. %) of eligible cases included in a registry/database.

### *Patient population*

Patients (denominator) for this linkage study were patients from the PARAMEDIC trial who were transported to hospital by EMS and not known to be deceased (i.e. documented as alive or unknown status) on arrival at the emergency department (ED).

Since NHS Digital, responsible for HES, only provides annual data up to 1<sup>st</sup> April each year, no data on trial patients recruited on or after 1<sup>st</sup> April 2013 had any HES data returned for this data request. We therefore limited our analysis of the linked registry data to patients recruited to the PARAMEDIC trial between April 2010 and March 2013.

### *Study approvals*

The PARAMEDIC trial was approved by the Coventry Research Ethics Committee (reference 09/H1210/69) and sponsored by the University of Warwick, UK. The study was conducted in accordance with the principles of Good Clinical Practice and the Mental Capacity Act (2005). Specific approval for access to personal data without consent and the data linkage reported in this paper was obtained from the Confidentiality Advisory Group, part of the Health Research Authority (reference:

1  
2  
3 1 ECC 2-02 (c)/2011). At the time of the study this activity was undertaken by the National Information  
4 Governance Board for Health and Social Care Ethics and Confidentiality Committee.

### 6 7 3 *Data linkage procedure*

8 4 Data access applications were submitted to national administrative and disease registries between  
9 5 2012-2014 to request patient case mix and clinical variables (Supplementary Table 1). The following  
10 6 patient identifiers were sent to the NHSD, ICNARC and NICOR to identify their clinical records: trial  
11 7 number, cardiac arrest date, ambulance service case number, 999 call time, hospital name, hospital  
12 8 arrival time, hospital handover time, patient name, NHS number, home address and postcode. The  
13 9 trial data were linked to the two NICOR datasets (MINAP and NAPCI) on two separate occasions by a  
14 10 different member of NICOR staff, which reassuringly generated the same results. Extracted  
15 11 anonymous data were encrypted and sent back to the trial team between June 2014 and June 2015.

16 12 Linked data may contain multiple, non-event related hospital records within the requested linkage  
17 13 period. We firstly used patient cardiac arrest (trial event) date to identify the records with exactly  
18 14 matched admission/visit date in the respective data sources. However, event and admission dates  
19 15 could be different due to potential data definition discrepancies. For instance, a trial event could  
20 16 occur before midnight and the patient was admitted to hospital after midnight. Therefore, we  
21 17 relaxed the date match criterion to a 5-day range (date of cardiac arrest with +/- 2 days). A matched  
22 18 record was redefined as if the admission/visit date falls in the range. We considered the range would  
23 19 be sufficiently large to mitigate against any date discrepancies in different sources and also be  
24 20 reasonably small to reduce the chance of mismatch in the case of early re-admission. Where  
25 21 multiple records could be matched to a single trial event in the same routine dataset, separate rules  
26 22 were used to extract the retrieved information: 1) where a patient had multiple episodes in HES,  
27 23 only the one with recorded death or discharge date was retained. If a patient had not been  
28 24 discharged from hospital, the episode with latest ward admission date was used. 2) Where multiple  
29 25 admissions to ICU were recorded in CMP, only the first ICU admission was linked to a trial event. 3)  
30 26 Since the MINAP dataset provided to us by NICOR only contained year and month of admission, only  
31 27 the earliest admission was used. 4) Only the first procedure was included for the linkage to the  
32 28 NAPCI registry data, since patients can have more than one interventional procedure (and thus  
33 29 another record) during the index admission.

### 30 30 *Data linkage rate*

31 31 For HES data, we developed the linkage and match rate for linked and matched (or correctly linked)  
32 32 cases as follows:

33 33

1  
2  
3 1 HES linkage rate =  $\frac{\text{N of patients with linked HES inpatient, Critical care or A\&E data}}{\text{N of patients not known to be deceased at ED}}$   
4 2  
5 3

6  
7 4 HES match rate =  $\frac{\text{N of patients with matched (correctly linked) HES inpatient, Critical care or A\&E data}}{\text{N of patients not known to be deceased at ED}}$   
8 5  
9 6

10  
11 7 Similar equations were used to determine the rates for each of the datasets i.e. MINAP, NAPCI and  
12 8 CMP. As we were not able to confirm which patient should actually be collected in these datasets,  
13 9 we employed same denominator used in the above equations.

#### 10 *Data linkage quality*

11 11 Match rank is an indicator used in HES to show the confidence of match: 1 suggests the best match  
12 12 and 8 the worst. Level 1-3 appear to be of high quality as cases are matched based on a combination  
13 13 of unique NHS number and data of date of birth, sex and home postcode. The quality of linkage in  
14 14 matched HES was therefore summarised on the basis of percentage of level 1-3.

#### 15 *Data representativeness*

16 16 Data representativeness was assessed in two comparisons. The first comparison intended to assess  
17 17 whether the patients with correctly linked (i.e. matched) HES data could be representative of the  
18 18 trial population. It was carried out in patients with and without matched HES inpatient, Critical Care  
19 19 or A&E data (comparison 1). The second comparison intended to assess the difference between two  
20 20 critical care data sources. We were not able to compare data from these two sources directly as  
21 21 some patient care data were collected in both databases. Hence, we split the patients by their linked  
22 22 data sources and made the comparison between patients with HES Critical Care only, with CMP data  
23 23 only and with both HES Critical Care and CMP data (comparison 2).

24 24 For both comparisons, we compared patient and event characteristics between the datasets.  
25 25 Continuous variables were compared using Mann-Whitney test in comparison 1 and Kruskal-Wallis  
26 26 test in comparison 2. Categorical variables were compared using Chi-square test. A two-sided p  
27 27 value <0.05 was considered statistically significant. All analyses were conducted in SAS v9.3 (Cary,  
28 28 NC, USA).

#### 29 *Data security and destruction*

30 30 We followed the Warwick Clinical Trials Unit Standard Operating Procedures (SOPs) for data storage,  
31 31 transfer, and data sharing. The data were retained and destroyed in accordance with relevant  
32 32 regulations and the University of Warwick's Data Sharing Agreements.

## 33 **Results**

1 In the PARAMEDIC trial, 2695 patients were transported to hospital and not known to be deceased  
 2 at ED. Of these 2398 (89.0%) were recruited between April 2010 and March 2013 and were  
 3 therefore included in this study (referred to as “linkage patients”). The data requests to NHSD,  
 4 ICNARC and NICOR retrieved different numbers of patient clinical records.

#### 5 *Summary of the linkage*

6 The flow chart of the linkage to HES is shown in Figure 1. The linkage patients were grouped into ICU  
 7 admitted (patients with matched HES Critical care data) and not admitted (patients with other  
 8 matched HES data). Meanwhile, patients with matched CMP data were also summarised in the  
 9 flowchart. This presented a comparison between CMP and HES Critical Care. 303 patients were  
 10 matched in both CMP and HES Critical Care. Overall, the linkage to HES data achieved a match rate  
 11 of 86.7% (2079 of 2398) with allowed variation in dates (date of cardiac arrest with +/- 2 days),  
 12 slightly improved from the use of exact date match approach (84.1%).

13 Linkage quality was high in matched cases: level 1-3 accounted for 97.9%. In unmatched cases,  
 14 91.5% (292 of 319) had no linked HES data and the rest, while linked with non-trial even related  
 15 data, had a good match rank ( $\leq 3$ ).

16 The summary of linkage and match rate in each dataset are shown in Table 2. All datasets contained  
 17 multiple linked records, indicating some patients had been linked to multiple admissions with  
 18 possible multiple episodes. Among the 2398 linkage patients, individual match rate varied depending  
 19 on the hospitalisation stage and received treatments. HES A&E had the highest individual match rate  
 20 (80.4%). In the patients admitted to ICU, CMP provided 53 more matched patients with a lower  
 21 proportion of unmatched data in linked patients compared to HES Critical Care.

23 *Figure 1: Linkage match rate and flowchart of patients retrieving HES or CMP data.*

26 *Table 2: Summary of linked PARAMEDIC trial patients to the respective registry databases*

| Data source | Dataset           | Number of linked records | Number of linked patients (linkage rate)* | Number of matched patients (match rate)* |
|-------------|-------------------|--------------------------|-------------------------------------------|------------------------------------------|
| NHSD        | HES Inpatient     | 12875                    | 1617 (67.4%)                              | 771 (32.2%)                              |
|             | HES Critical care | 545                      | 433 (18.1%)                               | 354 (14.8%)                              |
|             | HES A&E           | 6434                     | 2186 (91.2%)                              | 1927 (80.4%)                             |

|        | Overall | 19854 | 2277 (95.0%) | 2079 (86.7%) |
|--------|---------|-------|--------------|--------------|
| ICNARC | CMP     | 435   | 410 (17.1%)  | 407 (17.0%)  |
| NCAP   | MINAP   | 244   | 218 (9.1%)   | 182 (7.6%)   |
|        | PCI     | 153   | 128 (5.3%)   | 101 (4.2%)   |

Note: \*: Percentage is calculated using the number in the column divided by 2398 linkage patients.

A summary of retrieved information for each linked dataset as well as the degree of data missingness for each field is available in the online supplementary materials. In Supplementary Table 2, the trial patients that had not been matched to the HES records were similar to those that with matched records in age (mean age 71.8 and 73.6 respectively), male (67.4% and 63.3% respectively were male). They were also similar between groups in initial cardiac arrest aetiology where most were of cardiac origin (85.3% and 85.9% respectively) and in initial rhythm (shockable rhythm 31.0% and 31.3%). Patients with unmatched data were more likely to have had a cardiac arrest in a public place (27.9%) compared with of those with matched records (16%), witnessed by bystander (53.3% versus 46.3%) and had longer EMS response time (7.2 versus 6.1 minutes). Supplementary Table 3 illustrates the comparison of demographic and event characteristics of patients with matched HES Critical Care and CMP data. Characteristics were similar in all three groups, except for a significant difference in the EMS response time.

## Discussion

This study aimed to demonstrate the feasibility of collecting trial outcome data during patient follow up in a prehospital cardiac arrest trial via linkage to national registries. We achieved an overall match rate of 86.7% in 2398 patients using HES data. The data linkage provided important administrative and additional clinical data that allowed extended analyses of the intervention effect and provided more details of patient journey in the trial. We also evaluated the representativeness of retrieved HES and CMP data by comparing patient and trial event characteristics. No substantial difference was found in patients with and without matched HES inpatient, Critical Care or A&E data, as well as in patients with matched HES Critical Care only, CMP only and both datasets.

This was the first study evaluating the supplement of routinely collected administrative data in a cardiac arrest trial in the UK. Our match rate was in line with observational studies linking EMS data to hospital records,<sup>17-20</sup> and data validation studies.<sup>21</sup> Our experience suggests it is feasible to obtain relevant data from administrative databases in a cardiac arrest trial. In addition to the high match rate reported in this paper, the matched data are deemed to be sufficiently representative of the trial population. The comparison between patients with and without matched HES showed low level

1 of imbalance of event characteristics. Overall the results suggested no substantial bias. We have  
2 found similar results in the matched ICU data.

3 The unmatched cases were likely to be associated with missing or inaccurate data. Data quality could  
4 be at increased risk due to the challenging circumstances of cardiac arrest and complexity of patient  
5 handling following hospital arrival. In addition, routine data in the chosen registries are not  
6 systematically adjudicated. Lack of clinical engagement may compromise the case ascertainment  
7 and data quality,<sup>22</sup> leading to suboptimal linkage. NHS Digital employs deterministic and probabilistic  
8 methods in the data linkage. The latter calculates probability weight based on combinations of  
9 linkage variables and determines linkage based on a cut-off threshold. Although this method largely  
10 improves the linkage, it could incorrectly link record pairs and miss valid ones, undermining the  
11 reliability of linkage.

12 Linkage to individual routine datasets resulted in variable match rates. HES A&E generated the  
13 highest rate of 80.4% as most patients were taken by EMS to ED for assessment before being  
14 admitted to specialist hospital units. Other rates reflected the proportion of specific groups of  
15 patients in the linkage. The CMP, MINAP and NAPCI registries are focused on selected patients with  
16 a specific diagnosis and/or requiring specialist care, reflected in strict inclusion and exclusion criteria;  
17 for example MINAP comprises data on patients with suspected and/or confirmed acute coronary  
18 syndrome, NAPCI on interventional cardiology whilst CMP registry collects data on patients admitted  
19 to critical care/intensive care units within any given hospital. In this study, MINAP and NAPCI  
20 generated 9.1% and 5.3% respectively. Patients who die in the ED are less likely to be recorded on  
21 MINAP, and only those patients receiving interventional cardiology are recorded in NAPCI.

22 Use of routine data has the potential to reduce the costs of conducting trials. The cost of the TASTE  
23 trial was reported as US\$300,000, or approximately \$50 per patient,<sup>42</sup> 2 per cent of the cost of a  
24 traditional randomised trial, but differs from the PARAMEDIC trial in that we did not use registry  
25 data to identify and recruit patients in the challenging and time-pressured setting of our-of-hospital  
26 cardiac arrest. In the West of Scotland Coronary Prevention (WOSCOPS) trial, data linkage reduced  
27 costs of long term follow up to less than one per cent of trial budget.<sup>23</sup> However, the time cost of  
28 linkage could be unrealistic for some trials. Linkage for the PARAMEDIC trial took up to three years  
29 from application to the trial team obtaining the data. It has been suggested that NHS Digital, who  
30 performed the linkage to HES for our study was overwhelmed with data linkage applications.<sup>24</sup> This  
31 may limit the usefulness of administrative data in trials with funder-imposed deadlines for  
32 completion.

### 1 *Limitations:*

2 Our study had several limitations. The matching reliability was suboptimal due to relaxed matching  
3 criteria (using range of event date), matching methods and potential issues of data quality and  
4 completeness, common to administrative data. Bohensky et al.<sup>25</sup> conducted an evidence synthesis of  
5 data linkage studies and identified factors such as sub-optimal or incomplete linkage leading to  
6 systematic bias. They considered the participant or population characteristics that can influence the  
7 validity and completeness of data linkage and may in turn lead to systematic bias in reporting. They  
8 reported variation in quality of data linkage across geographical/hospital sites, which could be due to  
9 high staff turnover or not sufficient resources allocated to the data collection and/or coding. We  
10 have not considered such variations in this study, but overall match quality was high in the matched  
11 cases.

12 Secondly, routine data were not fully available for all patients transported to hospital. Some patients  
13 were not included in the linkage as their data were not available in HES at the time of our data  
14 application. Although no substantial bias was shown, the generalisability of results could be limited.  
15 Several data fields were incomplete, for example, MINAP captures most ST elevation myocardial  
16 infarction (STEMI) cases but data for non-STEMI are less complete. We also cannot confirm how  
17 many patients required specialist care and should be included in non-HES datasets. Therefore, we  
18 were unable to assess and report the impact of unmatched cases in the linkage to these registries.

19 Thirdly, we used the first matched admission without considering repeated or later admissions. We  
20 were therefore unlikely to fully describe patients' hospital pathway based on matched information.

21 Fourthly, our focus for the present study was on assessing the feasibility of using administrative data  
22 for purposes of follow-up. We did not assess the utility of administrative data to facilitate  
23 recruitment of trial patients since this was considered unrealistic in the clinical context of cardiac  
24 arrest.

25 Fifthly, we did not assess the financial cost of manual data collection at hospitals to compare with  
26 the cost of the use of registries in the trial linkage.

### 27 *Recommendations*

28 Based on our experience, we made the following recommendations to improve the use of data  
29 linkage in trials:

- 30 1. When planning a trial using linkage to administrative registries, careful planning is required  
31 to assess availability of the required data. Linkage to routine data in different jurisdictions or

- 1 multiple registries requires separate applications for data release and may be subject to data  
2 availability.
- 3 2. Trialists need to be mindful of prolonged processes for regulatory approvals, data release  
4 and validation. These processes may extend beyond trial funding.
- 5 3. Data linkage is a lengthy often unpredictable process in the application stage, possibly due  
6 to the restricted capacity of registries funded primarily to assess quality of care. Most  
7 registries in the NHS are funded as national audits and do not have sufficient resources for  
8 the timely processing of data sharing requests.
- 9 4. The quality of routinely collected data in the national registries may be inferior to that  
10 collected using traditional trial processes. Registry data are collected in high volume with  
11 limited resources and the validation process is unlikely to be as robust as in trials that are  
12 better resourced. Moreover, collected variables in registries are reviewed periodically and  
13 may change to reflect advances in clinical practice, which can impact on data completeness.
- 14 5. It is common for registries to charge a fee for data release, which should be costed in to trial  
15 budgets.

## 16 **Conclusions**

17 This study shows that it is feasible to track patients from the pre-hospital setting through to hospital  
18 admission using routinely available administrative datasets with a moderate to high degree of  
19 success. This may improve the efficiency and reduce the costs for longer-term follow-up in cardiac  
20 arrest trials.

21



## 1 **Declaration of interests**

2 GDP, RL, TQ, CDD and SG report grants from NIHR HTA Programme during the conduct of the study.

3 The other authors declare no competing interests.

## 4 **Author's contributions**

5 CS, JH, SG and GDP led on the data linkage. CJ analysed data. CJ, TQ and LG drafted the manuscript  
6 with input from the co-authors; RL, CS, JH, CDD, HP, MAS, NR, SJM, SG and GDP reviewed the  
7 manuscript. All authors approved the final version.

## 10 **Acknowledgments**

11 This is a summary of independent research partly funded by the National Institute for Health  
12 Research's (NIHR) Health Technology Assessment Programme (Grant Reference Number HTA-  
13 07/37/69). The views expressed are those of the author(s) and not necessarily those of the NHS, the  
14 NIHR, of the Department of Health. GDP received support as a NIHR Senior Investigator. MS is  
15 supported as an NIHR Doctoral Research Fellow. We thank the independent members of the Trial  
16 Steering Committee (Jon Nicholl, Helen Snooks, Fionna Moore, Alasdair Gray, Martyn Box, Father  
17 Neil Bayliss, and John Long) and the Data Monitoring Committee (Marion Campbell, Jerry Nolan, and  
18 Kathy Rowan). We acknowledge support from the OHCAO registry project that is funded by the  
19 British Heart Foundation and Resuscitation Council (UK).

## 20 **Data sharing statement**

21 No additional data sharing available.

1

## 2 References

- 3 1. Neumar RW, Shuster M, Callaway CW, et al. Part 1: Executive Summary: 2015 American Heart  
4 Association Guidelines Update for Cardiopulmonary Resuscitation and Emergency  
5 Cardiovascular Care. *Circulation* 2015;**132**(18 Suppl 2):S315-67. doi:  
6 10.1161/CIR.0000000000000252
- 7 2. Whitehead L, Perkins GD, Clarey A, et al. A systematic review of the outcomes reported in cardiac  
8 arrest clinical trials: the need for a core outcome set. *Resuscitation* 2015;**88**:150-7. doi:  
9 10.1016/j.resuscitation.2014.11.013
- 10 3. Lauer MS, Bonds D. Eliminating the "expensive" adjective for clinical trials. *Am Heart J*  
11 2014;**167**(4):419-20. doi: 10.1016/j.ahj.2013.12.003
- 12 4. Frobert O, Lagerqvist B, Olivecrona GK, et al. Thrombus aspiration during ST-segment elevation  
13 myocardial infarction. *N Engl J Med* 2013;**369**(17):1587-97. doi: 10.1056/NEJMoa1308789
- 14 5. James S, Rao SV, Granger CB. Registry-based randomized clinical trials--a new clinical trial  
15 paradigm. *Nat Rev Cardiol* 2015;**12**(5):312-6. doi: 10.1038/nrcardio.2015.33
- 16 6. Lauer MS, D'Agostino RB, S.r. The randomized registry trial--the next disruptive technology in  
17 clinical research? *N Engl J Med* 2013;**369**(17):1579-81. doi: 10.1056/NEJMp1310102
- 18 7. Rao SV, Hess CN, Barham B, et al. A registry-based randomized trial comparing radial and femoral  
19 approaches in women undergoing percutaneous coronary intervention: the SAFE-PCI for  
20 Women (Study of Access Site for Enhancement of PCI for Women) trial. *JACC Cardiovasc*  
21 *Interv* 2014;**7**(8):857-67. doi: 10.1016/j.jcin.2014.04.007
- 22 8. Hofmann R, James SK, Svensson L, et al. DETermination of the role of OXYgen in suspected Acute  
23 Myocardial Infarction trial. *Am Heart J* 2014;**167**(3):322-8. doi: 10.1016/j.ahj.2013.09.022
- 24 9. Perkins GD, Woollard M, Cooke MW, et al. Prehospital randomised assessment of a mechanical  
25 compression device in cardiac arrest (PaRAMeDIC) trial protocol. *Scand J Trauma Resusc*  
26 *Emerg Med* 2010;**18**:58. doi: 10.1186/1757-7241-18-58
- 27 10. Perkins GD, Lall R, Quinn T, et al. Mechanical versus manual chest compression for out-of-  
28 hospital cardiac arrest (PARAMEDIC): a pragmatic, cluster randomised controlled trial.  
29 *Lancet* 2015;**385**(9972):947-55. doi: 10.1016/S0140-6736(14)61886-9
- 30 11. Ji C, Lall R, Quinn T, et al. Post-admission outcomes of participants in the PARAMEDIC trial: A  
31 cluster randomised trial of mechanical or manual chest compressions. *Resuscitation*  
32 2017;**118**:82-88. doi: 10.1016/j.resuscitation.2017.06.026
- 33 12. Marti J, Hulme C, Ferreira Z, et al. The cost-effectiveness of a mechanical compression device in  
34 out-of-hospital cardiac arrest. *Resuscitation* 2017;**117**:1-7. doi:  
35 10.1016/j.resuscitation.2017.04.036
- 36 13. Rajagopal S, Kaye CR, Lall R, et al. Characteristics of patients who are not resuscitated in out of  
37 hospital cardiac arrests and opportunities to improve community response to cardiac arrest.  
38 *Resuscitation* 2016;**109**:110-15. doi: 10.1016/j.resuscitation.2016.09.014
- 39 14. Herrett E, Smeeth L, Walker L, et al. The Myocardial Ischaemia National Audit Project (MINAP).  
40 *Heart* 2010;**96**(16):1264-7. doi: 10.1136/hrt.2009.192328
- 41 15. Ludman PF, de Belder MA, McLenachan JM, et al. The importance of audit to monitor  
42 applications of procedures and improve primary angioplasty results. *EuroIntervention*  
43 2012;**8 Suppl P**:P62-70. doi: 10.4244/EIJV8SPA11
- 44 16. Harrison DA, Brady AR, Rowan K. Case mix, outcome and length of stay for admissions to adult,  
45 general critical care units in England, Wales and Northern Ireland: the Intensive Care  
46 National Audit & Research Centre Case Mix Programme Database. *Crit Care* 2004;**8**(2):R99-  
47 111. doi: 10.1186/cc2834
- 48 17. Boyle MJ. The experience of linking Victorian emergency medical service trauma data. *BMC Med*  
49 *Inform Decis Mak* 2008;**8**:52. doi: 10.1186/1472-6947-8-52

- 1  
2  
3 1 18. Seymour CW, Kahn JM, Martin-Gill C, et al. Creating an infrastructure for comparative  
4 2 effectiveness research in emergency medical services. *Acad Emerg Med* 2014;**21**(5):599-607.  
5 3 doi: 10.1111/acem.12370  
6 4 19. Mears GD, Rosamond WD, Lohmeier C, et al. A link to improve stroke patient care: a successful  
7 5 linkage between a statewide emergency medical services data system and a stroke registry.  
8 6 *Acad Emerg Med* 2010;**17**(12):1398-404. doi: 10.1111/j.1553-2712.2010.00925.x  
9 7 20. Hettinger AZ, Cushman JT, Shah MN, et al. Emergency medical dispatch codes association with  
10 8 emergency department outcomes. *Prehosp Emerg Care* 2013;**17**(1):29-37. doi:  
11 9 10.3109/10903127.2012.710716  
12 10 21. Barry SJ, Dinnett E, Kean S, et al. Are routinely collected NHS administrative records suitable for  
13 11 endpoint identification in clinical trials? Evidence from the West of Scotland Coronary  
14 12 Prevention Study. *PLoS One* 2013;**8**(9):e75379. doi: 10.1371/journal.pone.0075379  
15 13 22. Li G, Sajobi TT, Menon BK, et al. Registry-based randomized controlled trials- what are the  
16 14 advantages, challenges, and areas for future research? *J Clin Epidemiol* 2016;**80**:16-24. doi:  
17 15 10.1016/j.jclinepi.2016.08.003  
18 16 23. McCowan C. Using routinely collected clinical data to support clinical trials: a view from Scotland.  
19 17 Proceedings from the Clinical Trials Ontario 2015 Clinical Trials Conference 04-05 March  
20 18 2015. [http://www.ctontario.ca/cms/media/cto-2015-conference-speaker-](http://www.ctontario.ca/cms/media/cto-2015-conference-speaker-presentation_colin-mccowan.pdf)  
21 19 [presentation\\_colin-mccowan.pdf](http://www.ctontario.ca/cms/media/cto-2015-conference-speaker-presentation_colin-mccowan.pdf) (accessed 29 November 2017).  
22 20 24. Filippou J. Slow and costly access to anonymised patient data impedes academic research. *BMJ*  
23 21 2015;**351**:h5087. doi: 10.1136/bmj.h5087  
24 22 25. Bohensky MA, Jolley D, Sundararajan V, et al. Data linkage: a powerful research tool with  
25 23 potential problems. *BMC Health Serv Res* 2010;**10**:346. doi: 10.1186/1472-6963-10-346  
26  
27  
28  
29  
30  
31  
32  
33  
34  
35  
36  
37  
38  
39  
40  
41  
42  
43  
44  
45  
46  
47  
48  
49  
50  
51  
52  
53  
54  
55  
56  
57  
58  
59  
60

1  
2  
3  
4  
5  
6  
7  
8  
9  
10  
11  
12  
13  
14  
15  
16  
17  
18  
19  
20  
21  
22  
23  
24  
25  
26  
27  
28  
29  
30  
31  
32  
33  
34  
35  
36  
37  
38  
39  
40  
41  
42  
43  
44  
45  
46  
47  
48  
49  
50  
51  
52  
53  
54  
55  
56  
57  
58  
59  
60

For peer review only

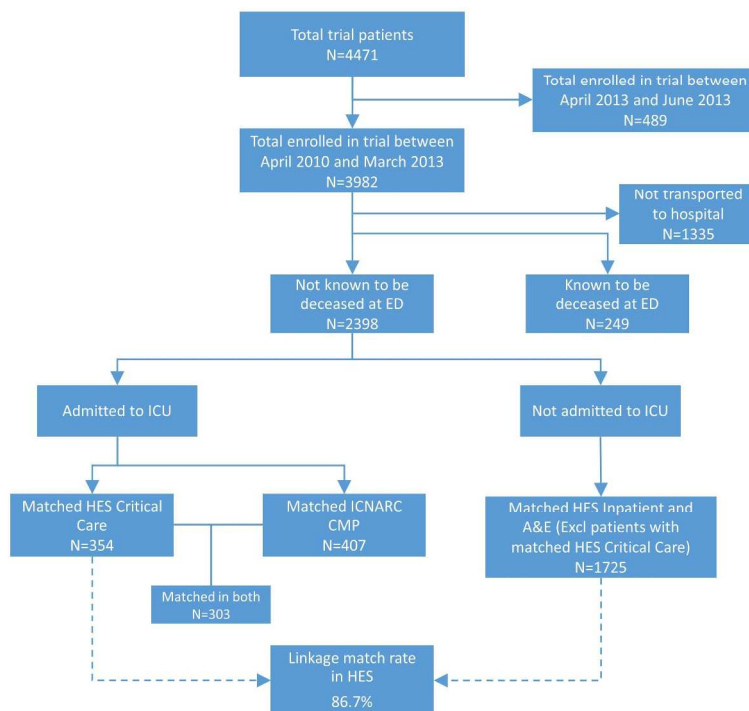

Figure 1: Linkage match rate and flowchart of patients retrieving HES or CMP data.

Legend: ICU, intensive care unit; ICNARC, Intensive Care National Audit and Research Centre; CMP, Case Mix Programme, HES, Hospital Episode Statistics; ED, Emergency Department; A&E, Accident and Emergency.

254x190mm (300 x 300 DPI)

## Supplementary materials:

Supplementary Table 1: Summary of retrieved information in each linked dataset.

| HES Inpatient            |                                                                                                                       | All         |
|--------------------------|-----------------------------------------------------------------------------------------------------------------------|-------------|
| CSK operation            | No                                                                                                                    | 606 (79.6%) |
|                          | Yes                                                                                                                   | 155 (20.4%) |
| Destination of discharge | The usual place of residence, including no fixed abode                                                                | 192 (24.9%) |
|                          | Temporary place of residence when usually resident elsewhere                                                          | 4 (0.5%)    |
|                          | Repatriation from high security psychiatric hospital (from 1999-2000)                                                 | 0 (0.0%)    |
|                          | Repatriation from high security psychiatric hospital (from 1999-2000)                                                 | 0 (0.0%)    |
|                          | Penal establishment - court (from 1999-2000)                                                                          | 0 (0.0%)    |
|                          | Penal establishment - police station (from 1999-2000)                                                                 | 0 (0.0%)    |
|                          | Penal establishment - court and police station excluded (from 1999-2000 to 2006-07)                                   | 0 (0.0%)    |
|                          | High security psychiatric hospital, Scotland (from 1999-2000)                                                         | 0 (0.0%)    |
|                          | NHS other hospital provider - high security psychiatric accommodation                                                 | 0 (0.0%)    |
|                          | NHS other hospital provider - medium secure unit (from 1999-2000)                                                     | 32 (4.2%)   |
|                          | NHS other hospital provider - ward for maternity patients or neonates                                                 | 0 (0.0%)    |
|                          | NHS other hospital provider - ward for patients who are mentally ill or have learning disabilities                    | 0 (0.0%)    |
|                          | NHS run nursing home, residential care home or group home                                                             | 3 (0.4%)    |
|                          | Local authority Part 3 residential accommodation - where care is provided (from 1996-97)                              | 0 (0.0%)    |
|                          | Local authority foster care, but not in Part 3 residential accommodation - where care is provided (from 1996-97)      | 0 (0.0%)    |
|                          | LA home or care (1989-90 to 1995-96)                                                                                  | 0 (0.0%)    |
|                          | Non-NHS run hospital - medium secure unit (from 2003-04)                                                              | 1 (0.1%)    |
|                          | Non-NHS (other than local authority) run residential care home (from 1996-97 to 2003-04) and care home (from 2003-04) | 3 (0.4%)    |
|                          | Non-NHS (other than local authority) run nursing home (from 1996-97 to 2003-04)                                       | 0 (0.0%)    |
|                          | Non-NHS run hospital                                                                                                  | 0 (0.0%)    |
|                          | Non-NHS (other than local authority) run hospice                                                                      | 2 (0.3%)    |
|                          | Non-NHS institution (1989-90 to 1995-96)                                                                              | 0 (0.0%)    |
|                          | Not applicable                                                                                                        | 7 (0.9%)    |
| Not known                | 1 (0.1%)                                                                                                              |             |
| Died                     | 522 (67.7%)                                                                                                           |             |
| Method of discharge      | Discharged on clinical advice or with clinical consent                                                                | 234 (30.4%) |
|                          | Self discharged, or discharged by a relative or advocate                                                              | 5 (0.6%)    |

|                                    |                                                                                     |              |
|------------------------------------|-------------------------------------------------------------------------------------|--------------|
|                                    | Discharged by a mental health review tribunal, the Home Secretary or a court        | 0 (0.0%)     |
|                                    | Baby was still born                                                                 | 0 (0.0%)     |
|                                    | Not applicable: patient still in hospital                                           | 10 (1.3%)    |
|                                    | Not known: a validation error                                                       | 0 (0.0%)     |
|                                    | Died                                                                                | 522 (67.7%)  |
| IMD 2004 index                     | Missing                                                                             | 84 (10.9%)   |
|                                    | Least deprived 10%                                                                  | 64 (8.3%)    |
|                                    | Less deprived 10-20%                                                                | 43 (5.6%)    |
|                                    | Less deprived 20-30%                                                                | 47 (6.1%)    |
|                                    | Less deprived 30-40%                                                                | 35 (4.5%)    |
|                                    | Less deprived 40-50%                                                                | 50 (6.5%)    |
|                                    | More deprived 10-20%                                                                | 80 (10.4%)   |
|                                    | More deprived 20-30%                                                                | 84 (10.9%)   |
|                                    | More deprived 30-40%                                                                | 58 (7.5%)    |
|                                    | More deprived 40-50%                                                                | 61 (7.9%)    |
|                                    | Most deprived 10%                                                                   | 165 (21.4%)  |
| Hospital length of stay*           |                                                                                     | 7.7 (20.3)   |
| <b>HES A&amp;E</b>                 |                                                                                     | <b>All</b>   |
| A&E department type - A&E only     | Emergency departments                                                               | 1865 (96.8%) |
|                                    | Consultant-led mono specialty accident and emergency service'                       | 0 (0.0%)     |
|                                    | Other type of A&E. Excludes NHS walk-in centres                                     | 4 (0.2%)     |
|                                    | NHS walk-in centres                                                                 | 1 (0.1%)     |
|                                    | Not known                                                                           | 57 (3.0%)    |
| A&E attendance disposal - A&E only | Admitted to hospital bed / became a lodged patient of the same health care provider | 560 (29.1%)  |
|                                    | Discharged – follow-up treatment to be provided by general practitioner             | 5 (0.3%)     |
|                                    | Discharged – did not require any follow-up treatment                                | 9 (0.5%)     |
|                                    | Referred to A&E clinic                                                              | 13 (0.7%)    |
|                                    | Referred to fracture clinic                                                         | 1 (0.1%)     |
|                                    | Referred to other outpatient clinic                                                 | 1 (0.1%)     |
|                                    | Transferred to other healthcare provider                                            | 28 (1.5%)    |
|                                    | Referred to other healthcare professional                                           | 6 (0.3%)     |
|                                    | Left department before being treated                                                | 1 (0.1%)     |
|                                    | Left department having refused treatment                                            | 0 (0.0%)     |
|                                    | Other                                                                               | 5 (0.3%)     |
|                                    | Not known                                                                           | 2 (0.1%)     |
|                                    | Died in department                                                                  | 1296 (67.3%) |
| IMD 2004 index                     | Missing                                                                             | 7 (0.4%)     |
|                                    | Least deprived 10%                                                                  | 126 (6.5%)   |
|                                    | Less deprived 10-20%                                                                | 95 (4.9%)    |
|                                    | Less deprived 20-30%                                                                | 139 (7.2%)   |
|                                    | Less deprived 30-40%                                                                | 120 (6.2%)   |

|                                                                           |                                    |             |
|---------------------------------------------------------------------------|------------------------------------|-------------|
|                                                                           | Less deprived 40-50%               | 133 (6.9%)  |
|                                                                           | More deprived 10-20%               | 257 (13.3%) |
|                                                                           | More deprived 20-30%               | 213 (11.1%) |
|                                                                           | More deprived 30-40%               | 173 (9.0%)  |
|                                                                           | More deprived 40-50%               | 205 (10.6%) |
|                                                                           | Most deprived 10%                  | 459 (23.8%) |
| <b>HES Critical care</b>                                                  |                                    | <b>All</b>  |
| Length of level 2 CC days                                                 |                                    | 0.9 (1.7)   |
| Length of level 3 CC days                                                 |                                    | 4.4 (5.4)   |
| Total length of CC days                                                   |                                    | 6.6 (15.4)  |
| <b>ICNARC CMP</b>                                                         |                                    | <b>All</b>  |
| Length of level 0 ITU days                                                |                                    | 0 (0.3)     |
| Length of level 1 ITU days                                                |                                    | 0.1 (0.6)   |
| Length of level 2 ITU days                                                |                                    | 1.1 (4.0)   |
| Length of level 3 ITU days                                                |                                    | 5.2 (9.4)   |
| Total length of ITU days                                                  |                                    | 6.5 (12.9)  |
| Total length of ITU days in 30 days survived patients                     |                                    | 10.5 (22.0) |
| Total length of ITU days in 30 days deceased patients                     |                                    | 4.8 (4.5)   |
| Days of alive and free of ITU stay in the first 28 days of cardiac arrest |                                    | 6.9 (10.3)  |
| Treatment withheld/withdrawn                                              | Both withheld then withdrawn       | 23 (5.7%)   |
|                                                                           | Withheld                           | 4 (1.0%)    |
|                                                                           | Withdrawn                          | 133 (32.7%) |
|                                                                           | Neither                            | 247 (60.7%) |
| Organ donation                                                            | Heartbeating solid organ donor     | 13 (3.2%)   |
|                                                                           | No solid organs or tissues donated | 199 (48.9%) |
|                                                                           | Non-heartbeating solid organ donor | 15 (3.7%)   |
|                                                                           | Tissue donor only                  | 8 (2.0%)    |
| <b>NICOR MINAP</b>                                                        |                                    | <b>All</b>  |
| Admission Diagnosis                                                       | Definite myocardial infarction     | 126 (69.2%) |
|                                                                           | Acute coronary syndrome            | 30 (16.5%)  |
|                                                                           | Chest pain cause                   | 4 (2.2%)    |
|                                                                           | Other initial diagnosis            | 22 (12.1%)  |
| Admission Ward                                                            | Missing                            | 1 (0.5%)    |
|                                                                           | Cardiac care unit                  | 94 (51.6%)  |
|                                                                           | Acute admissions unit              | 6 (3.3%)    |
|                                                                           | General medical ward               | 1 (0.5%)    |
|                                                                           | Intensive therapy unit             | 69 (37.9%)  |
|                                                                           | Other                              | 9 (4.9%)    |
|                                                                           | Cardiac ward (non CCU)             | 1 (0.5%)    |
|                                                                           | Stepdown ward                      | 0 (0.0%)    |
|                                                                           | Unknown                            | 0 (0.0%)    |
| Died in A&E                                                               | 1 (0.5%)                           |             |



|                                         |                                                             |             |
|-----------------------------------------|-------------------------------------------------------------|-------------|
| Initial Reperfusion Treatment           | Missing                                                     | 3 (2.2%)    |
|                                         | None                                                        | 18 (13.1%)  |
|                                         | Thrombolytic treatment                                      | 0 (0.0%)    |
|                                         | pPCI in house                                               | 116 (84.7%) |
|                                         | Referred for consideration for pPCI elsewhere               | 0 (0.0%)*   |
|                                         | Unknown                                                     | 0 (0.0%)    |
| Procedure performed                     | Missing                                                     | 30(21.9%)   |
|                                         | No angiogram                                                | 2 (1.5%)    |
|                                         | Angiogram but no PCI                                        | 9 (6.6%)    |
|                                         | Angiogram and PCI                                           | 96 (70.1%)  |
|                                         | Unknown                                                     | 0 (0.0%)    |
| Coronary angiography                    | Missing                                                     | 1(2.9%)     |
|                                         | Protocol driven investigation performed in this hospital    | 12(35.3%)   |
|                                         | Symptom driven investigation performed in this hospital     | 7 (20.6%)   |
|                                         | Protocol driven investigation performed at another hospital | 0 (0.0%)    |
|                                         | Symptom driven investigation performed at another hospital  | 0 (0.0%)    |
|                                         | Planned after discharge                                     | 0 (0.0%)    |
|                                         | Not applicable                                              | 9 (6.6%)    |
|                                         | Patient refused                                             | 1 (2.9%)    |
|                                         | Not performed                                               | 5 (14.7%)   |
| Unknown                                 | 0 (0.0%)                                                    |             |
| Coronary intervention                   | Missing                                                     | 6 (17.6%)   |
|                                         | Percutaneous coronary intervention                          | 9 (26.5%)   |
|                                         | CABG                                                        | 0 (0.0%)    |
|                                         | PCI planned after discharge                                 | 0 (0.0%)    |
|                                         | CABG planned after discharge                                | 1(2.9%)     |
|                                         | Not applicable                                              | 5 (14.7%)   |
|                                         | Patient refused                                             | 1 (2.9%)    |
|                                         | Not performed or arranged                                   | 11 (32.4%)  |
|                                         | Unknown                                                     | 0 (0.0%)    |
| Assessment at non-interventional centre | Missing                                                     | 5 (2.7%)    |
|                                         | No contact with a non interventional hospital               | 126 (69.2%) |
|                                         | Patient remains in ambulance                                | 0 (0.0%)    |
|                                         | A&E                                                         | 30 (16.5%)  |
|                                         | Acute assessment unit                                       | 2 (1.1%)    |
|                                         | CCU / cardiac facility                                      | 1 (0.5%)    |
|                                         | Self referral                                               | 0 (0.0%)    |
|                                         | Already in hospital                                         | 2 (1.1%)    |
|                                         | Other                                                       | 0 (0.0%)    |
| Unknown                                 | 16 (8.8%)                                                   |             |
| Assessment at interventional centre     | Missing                                                     | 59 (32.4%)  |
|                                         | Assessed in A&E                                             | 68 (37.4%)  |
|                                         | Acute assessment unit                                       | 1 (0.5%)    |
|                                         | CCU / cardiac facility                                      | 26 (14.3%)  |

|                                          |                     |             |
|------------------------------------------|---------------------|-------------|
|                                          | Catheter laboratory | 28 (15.4%)  |
|                                          | Already in hospital | 0 (0.0%)    |
|                                          | Unknown             | 0 (0.0%)    |
| <b>NICOR PCI</b>                         |                     | <b>All</b>  |
| Cardiopulmonary resuscitation (CPR)      | Missing             | 29 (28.7%)  |
|                                          | No                  | 72 (71.3%)  |
|                                          | Yes                 | 0 (0.0%)    |
| Coronary artery bypass grafting (CABG)   | Missing             | 0 (0.0%)    |
|                                          | No                  | 101 (100%)  |
|                                          | Yes                 | 0 (0.0%)    |
| Ventilation                              | Missing             | 101 (100%)* |
|                                          | No                  | 0 (0.0%)    |
|                                          | Yes                 | 0 (0.0%)    |
| Hypothermia                              | Missing             | 101 (100%)* |
|                                          | No                  | 0 (0.0%)    |
|                                          | Yes                 | 0 (0.0%)    |
| Percutaneous coronary intervention (PCI) | Missing             | 101 (100%)  |
|                                          | No                  | 0 (0.0%)    |
|                                          | Yes                 | 0 (0.0%)    |
|                                          | No                  | 0 (0.0%)    |
|                                          | Yes                 | 0 (0.0%)    |

Note: \*: Variables were added to the dataset after the linkage was performed.

Supplementary Table 2: Summary of demographic and cardiac arrest event characteristics in trial patients with and without matched HES inpatient, Critical care and A&E data

|                                                  |                       | HES matched<br>N=2079 | HES unmatched<br>N=319 | p value |
|--------------------------------------------------|-----------------------|-----------------------|------------------------|---------|
| Age (year)                                       |                       | 73.6 (21.9)           | 71.8 (24.4)            | 0.151   |
| Sex                                              | Male                  | 1315 (63.3%)          | 215 (67.4%)            | 0.151   |
|                                                  | Female                | 764 (36.8%)           | 104 (32.6%)            |         |
| Initial aetiology                                | Presumed cardiac      | 1786 (85.9%)          | 272 (85.3%)            | 0.864   |
|                                                  | Respiratory           | 146 (7.0%)            | 27 (8.5%)              |         |
|                                                  | Submersion            | 8 (0.4%)              | 1 (0.3%)               |         |
|                                                  | Other                 | 74 (3.6%)             | 9 (2.8%)               |         |
|                                                  | Unknown               | 65 (3.1%)             | 10 (3.1%)              |         |
| Initial rhythm                                   | VF                    | 624 (30.0%)           | 99 (31.0%)             | 0.468   |
|                                                  | VT                    | 20 (1.0%)             | 1 (0.3%)               |         |
|                                                  | PEA                   | 613 (29.5%)           | 83 (26.0%)             |         |
|                                                  | Asystole              | 727 (35.0%)           | 118 (37.0%)            |         |
|                                                  | Unknown               | 95 (4.6%)             | 18 (5.6%)              |         |
| Location                                         | Home                  | 1610 (77.4%)          | 206 (64.6%)            | <0.001  |
|                                                  | Public place          | 333 (16.0%)           | 89 (27.9%)             |         |
|                                                  | Other                 | 136 (6.5%)            | 24 (7.5%)              |         |
| Witness                                          | Not witnessed         | 508 (24.5%)           | 60 (18.8%)             | 0.027   |
|                                                  | By bystander          | 961 (46.3%)           | 170 (53.3%)            |         |
|                                                  | By EMS                | 413 (19.9%)           | 60 (18.8%)             |         |
|                                                  | By Non-EMS healthcare | 64 (3.1%)             | 4 (1.3%)               |         |
|                                                  | Unknown               | 132 (6.4%)            | 25 (7.8%)              |         |
| Cardiopulmonary resuscitation (CPR) by Bystander | No                    | 1104 (53.1%)          | 156 (48.9%)            | 0.376   |
|                                                  | Yes                   | 862 (41.5%)           | 144 (45.1%)            |         |
|                                                  | Unknown               | 113 (5.4%)            | 19 (6.0%)              |         |
| Response time (minute)†                          |                       | 6.1 (4.3)             | 7.2 (5.1)              | <.0001  |
| Survival at 30days                               | Alive                 | 224 (10.8%)           | 38 (11.9%)             | 0.544   |
|                                                  | Deceased              | 1855 (89.2%)          | 281 (88.1%)            |         |
| ROSC at hospital transfer                        | ROSC                  | 790 (38.0%)           | 125 (39.2%)            | <0.001  |
|                                                  | CPR in progress       | 1204 (57.9%)          | 135 (42.3%)            |         |
|                                                  | Unknown               | 85 (4.1%)             | 59 (18.5%)             |         |
| EQ5d at 3 months                                 |                       | 70.0 (20.0)           | 75.0 (20.0)            | 0.970   |
| EQ5d at 12 months                                |                       | 80.0 (30.0)           | 72.5 (26.0)            | 0.368   |
| SF12 mental health at 3 months                   |                       | 50.4 (16.8)           | 45.4 (23.0)            | 0.690   |
| SF12 physical health at 3 months                 |                       | 40.8 (14.2)           | 44.1 (15.0)            | 0.533   |
| SF12 mental health at 12 months                  |                       | 51.0 (14.5)           | 44.1 (10.5)            | 0.118   |
| SF12 physical health at 12 months                |                       | 45.2 (17.4)           | 38.4 (13.9)            | 0.059   |
| HADS Anxiety at 12 months                        |                       | 5.0 (7.0)             | 6.5 (5.0)              | 0.112   |

|                              |             |             |       |
|------------------------------|-------------|-------------|-------|
| HADS depression at 12 months | 4.0 (5.0)   | 6.0 (4.5)   | 0.163 |
| MMSE at 12 months            | 29.0 (3.0)  | 29.0 (2.0)  | 0.648 |
| PTSD at 12 months            | 27.0 (17.0) | 33.0 (19.0) | 0.280 |

Note: Continuous variables were shown as median (Interquartile range) and categorical variables were shown as n (percentage). †: response time was from 999 call to EMS arrival at scene.

For peer review only

Supplementary Table 3: Summary of demographic and cardiac arrest event characteristics in patients with matched HES Critical care only, CMP only and both.

|                                     |                       | HES Critical Care only | ICNARC CMP only | Critical care & CMP | p value |
|-------------------------------------|-----------------------|------------------------|-----------------|---------------------|---------|
| Age (year)                          |                       | 68.3 (24.6)            | 64.8 (28.2)     | 65.5 (21.2)         | 0.684   |
| Sex                                 | Male                  | 36 (70.6%)             | 66 (63.5%)      | 208 (68.7%)         | 0.556   |
|                                     | Female                | 15 (29.4%)             | 38 (36.5%)      | 95 (31.4%)          |         |
| Aetiology                           | Presumed cardiac      | 45 (88.2%)             | 84 (80.8%)      | 247 (81.5%)         | 0.554   |
|                                     | Respiratory           | 1 (2.0%)               | 12 (11.5%)      | 25 (8.3%)           |         |
|                                     | Submersion            | 0 (0.0%)               | 1 (1.0%)        | 1 (0.3%)            |         |
|                                     | Other                 | 3 (5.9%)               | 6 (5.8%)        | 20 (6.6%)           |         |
|                                     | Unknown               | 2 (3.9%)               | 1 (1.0%)        | 10 (3.3%)           |         |
| Location                            | Home                  | 37 (72.6%)             | 68 (65.4%)      | 209 (69.0%)         | 0.516   |
|                                     | Public place          | 14 (27.5%)             | 30 (28.9%)      | 79 (26.1%)          |         |
|                                     | Other                 | 0 (0.0%)               | 6 (5.8%)        | 15 (5.0%)           |         |
| Witness                             | No                    | 11 (21.6%)             | 26 (25%)        | 69 (22.8%)          | 0.981   |
|                                     | By bystander          | 29 (56.9%)             | 59 (56.7%)      | 174 (57.4%)         |         |
|                                     | By EMS                | 7 (13.7%)              | 13 (12.5%)      | 32 (10.6%)          |         |
|                                     | By Non-EMS healthcare | 1 (2.0%)               | 2 (1.9%)        | 9 (3.0%)            |         |
|                                     | Unknown               | 3 (5.9%)               | 4 (3.9%)        | 19 (6.3%)           |         |
| Cardiopulmonary resuscitation       | No                    | 24 (47.1%)             | 45 (43.3%)      | 136 (44.9%)         | 0.802   |
|                                     | Yes                   | 24 (47.1%)             | 52 (50.0%)      | 155 (51.2%)         |         |
|                                     | Unknown               | 3 (5.9%)               | 7 (6.7%)        | 12 (4.0%)           |         |
| Rhythm                              | VF                    | 26 (51%)               | 44 (42.3%)      | 153 (50.5%)         | 0.437   |
|                                     | VT                    | 2 (3.9%)               | 1 (1.0%)        | 4 (1.3%)            |         |
|                                     | PEA                   | 10 (19.6%)             | 25 (24.0%)      | 55 (18.2%)          |         |
|                                     | Asystole              | 11 (21.6%)             | 26 (25.0%)      | 80 (26.4%)          |         |
|                                     | Unknown               | 2 (3.9%)               | 8 (7.7%)        | 11 (3.6%)           |         |
| Response time (minute) <sup>†</sup> |                       | 6.6 (4.4)              | 6.7 (4.7)       | 6.0 (3.9)           | 0.034   |
| Survival at 30days                  | Alive                 | 19 (37.3%)             | 31 (29.8%)      | 93 (30.7%)          | 0.606   |
|                                     | Deceased              | 32 (62.8%)             | 73 (70.2%)      | 210 (69.3%)         |         |
| ROSC at hospital transfer           | ROSC                  | 42 (82.4%)             | 79 (76%)        | 241 (79.5%)         | 0.294   |
|                                     | CPR in progress       | 7 (13.7%)              | 14 (13.5%)      | 47 (15.5%)          |         |
|                                     | Unknown               | 2 (3.9%)               | 11 (10.6%)      | 15 (5.0%)           |         |
| EQ5d at 3 months                    |                       | 67.5 (24.0)            | 75.5 (16.0)     | 70.0 (25.0)         | 0.838   |
| EQ5d at 12 months                   |                       | 80.0 (14.0)            | 74.0 (20.0)     | 80.0 (25.0)         | 0.298   |
| SF12 mental health at 3 months      |                       | 48.4 (11)              | 48.3 (19.3)     | 49.3 (16.5)         | 0.794   |
| SF12 physical health at 3 months    |                       | 38.9 (13.2)            | 39.2 (13)       | 41.1 (14.2)         | 0.836   |
| SF12 mental health at 12 months     |                       | 51.6 (8)               | 43 (14.3)       | 47.8 (15.2)         | 0.543   |
| SF12 physical health at 12 months   |                       | 42.9 (21)              | 38.8 (14.6)     | 46.7 (15.6)         | 0.235   |

|                              |            |             |             |       |
|------------------------------|------------|-------------|-------------|-------|
| HADS Anxiety at 12 months    | 5.0 (5.0)  | 9.5 (6.5)   | 6.0 (6.0)   | 0.078 |
| HADS depression at 12 months | 4.0 (3.0)  | 6.0 (5.5)   | 5.0 (8.0)   | 0.368 |
| MMSE at 12 months            | 28.0 (3.0) | 29.0 (3.0)  | 29.0 (3.0)  | 0.717 |
| PTSD at 12 months            | 30.0 (8.5) | 40.0 (23.0) | 29.0 (15.0) | 0.631 |

Note: Continuous variables were shown as median (Interquartile range) and categorical variables were shown as frequency (percentage). †: response time is from 999 call to EMS arrival at scene.

For peer review only

# BMJ Open

## Feasibility of data linkage in the PARAMEDIC Trial: a cluster randomised trial of mechanical chest compression in out of hospital cardiac arrest

|                                 |                                                                                                                                                                                                                                                                                                                                                                                                                                                                                                                                                                                                                                                                                                                                                                                                                                                                                                                                                                                                                                                                                                                                                                                                               |
|---------------------------------|---------------------------------------------------------------------------------------------------------------------------------------------------------------------------------------------------------------------------------------------------------------------------------------------------------------------------------------------------------------------------------------------------------------------------------------------------------------------------------------------------------------------------------------------------------------------------------------------------------------------------------------------------------------------------------------------------------------------------------------------------------------------------------------------------------------------------------------------------------------------------------------------------------------------------------------------------------------------------------------------------------------------------------------------------------------------------------------------------------------------------------------------------------------------------------------------------------------|
| Journal:                        | <i>BMJ Open</i>                                                                                                                                                                                                                                                                                                                                                                                                                                                                                                                                                                                                                                                                                                                                                                                                                                                                                                                                                                                                                                                                                                                                                                                               |
| Manuscript ID                   | bmjopen-2018-021519.R1                                                                                                                                                                                                                                                                                                                                                                                                                                                                                                                                                                                                                                                                                                                                                                                                                                                                                                                                                                                                                                                                                                                                                                                        |
| Article Type:                   | Research                                                                                                                                                                                                                                                                                                                                                                                                                                                                                                                                                                                                                                                                                                                                                                                                                                                                                                                                                                                                                                                                                                                                                                                                      |
| Date Submitted by the Author:   | 16-May-2018                                                                                                                                                                                                                                                                                                                                                                                                                                                                                                                                                                                                                                                                                                                                                                                                                                                                                                                                                                                                                                                                                                                                                                                                   |
| Complete List of Authors:       | Ji, Chen; University of Warwick, Warwick Clinical Trials Unit<br>Quinn, Tom; St George's University of London & Kingston University, Faculty of Health, Social Care & Education<br>Gavalova, Lucia; St George's University of London & Kingston University, Faculty of Health, Social Care & Education<br>Lall, Ranjit; University of Warwick, Warwick Clinical Trials Unit<br>Scomparin, Charlotte; University of Warwick, Warwick Clinical Trials Unit<br>Horton, Jessica; University of Warwick, Warwick Clinical Trials Unit<br>Deakin, Charles; Southampton University Hospital, Shackleton Department of Anaesthetics<br>Pocock, Helen; South Central Ambulance Service NHS Foundation Trust<br>Smyth, Michael; University of Warwick, Warwick Clinical Trials Unit<br>Rees, Nigel; Welsh Ambulance Service NHS Trust<br>Brace-McDonnell, Samantha; University of Warwick, Warwick Clinical Trials Unit<br>Gates, Simon; University of Birmingham, Cancer Research UK Clinical Trials Unit, Institute of Cancer and Genomic Sciences; University of Warwick, Warwick Clinical Trials Unit<br>Perkins, Gavin; University of Warwick, Warwick Clinical Trials Unit; Heart of England NHS Foundation Trust |
| <b>Primary Subject Heading</b>: | Research methods                                                                                                                                                                                                                                                                                                                                                                                                                                                                                                                                                                                                                                                                                                                                                                                                                                                                                                                                                                                                                                                                                                                                                                                              |
| Secondary Subject Heading:      | Research methods, Epidemiology                                                                                                                                                                                                                                                                                                                                                                                                                                                                                                                                                                                                                                                                                                                                                                                                                                                                                                                                                                                                                                                                                                                                                                                |
| Keywords:                       | Adult cardiology < CARDIOLOGY, Clinical trials < THERAPEUTICS, Data linkage, Cardiac arrest                                                                                                                                                                                                                                                                                                                                                                                                                                                                                                                                                                                                                                                                                                                                                                                                                                                                                                                                                                                                                                                                                                                   |
|                                 |                                                                                                                                                                                                                                                                                                                                                                                                                                                                                                                                                                                                                                                                                                                                                                                                                                                                                                                                                                                                                                                                                                                                                                                                               |

SCHOLARONE™  
Manuscripts

1  
2  
3 **1 Feasibility of data linkage in the PARAMEDIC Trial: a cluster randomised trial of**  
4 **2 mechanical chest compression in out of hospital cardiac arrest**

5  
6 3 Chen Ji<sup>1</sup> ([C.Ji.3@warwick.ac.uk](mailto:C.Ji.3@warwick.ac.uk))  
7  
8 4 Tom Quinn<sup>2</sup> ([T.Quinn@sgul.kingston.ac.uk](mailto:T.Quinn@sgul.kingston.ac.uk))  
9  
10 5 Lucia Gavalova<sup>2</sup> ([L.Gavalova@sgul.kingston.ac.uk](mailto:L.Gavalova@sgul.kingston.ac.uk))  
11  
12 6 Ranjit Lall<sup>1</sup> ([R.Lall@warwick.ac.uk](mailto:R.Lall@warwick.ac.uk))  
13  
14 7 Charlotte Scomparin<sup>1</sup> ([C.Scomparin@warwick.ac.uk](mailto:C.Scomparin@warwick.ac.uk))  
15  
16 8 Jessica Horton<sup>1</sup> ([jessicahorton79@hotmail.com](mailto:jessicahorton79@hotmail.com))  
17  
18 9 Charles D Deakin<sup>3,4</sup> ([charlesdeakin@doctors.org.uk](mailto:charlesdeakin@doctors.org.uk))  
19  
20 10 Helen Pocock<sup>4</sup> ([Helen.Pocock1@nhs.net](mailto:Helen.Pocock1@nhs.net))  
21  
22 11 Michael A Smyth<sup>1</sup> ([M.A.Smyth@warwick.ac.uk](mailto:M.A.Smyth@warwick.ac.uk))  
23  
24 12 Nigel Rees<sup>5</sup> ([Nigel.Rees5@wales.nhs.uk](mailto:Nigel.Rees5@wales.nhs.uk))  
25  
26 13 Samantha J Brace-McDonnell<sup>1,6</sup> ([S.Brace-Mcdonnell@warwick.ac.uk](mailto:S.Brace-Mcdonnell@warwick.ac.uk))  
27  
28 14 Simon Gates<sup>1,7</sup> ([S.Gates@bham.ac.uk](mailto:S.Gates@bham.ac.uk))  
29  
30 15 Gavin D Perkins<sup>1,6</sup> ([G.D.Perkins@warwick.ac.uk](mailto:G.D.Perkins@warwick.ac.uk))  
31

32 16

- 33  
34 17 1. Warwick Clinical Trials Unit, University of Warwick, Coventry, UK  
35  
36 18 2. Faculty of Health, Social Care and Education, Kingston University and St George's, University of  
37 19 London, London, UK  
38  
39 20 3. NIHR Southampton Respiratory Biomedical Research Unit, University Hospital Southampton NHS  
40 21 Foundation Trust, Southampton, Hampshire, UK  
41  
42 22 4. South Central Ambulance Service NHS Foundation Trust, Otterbourne, UK  
43  
44 23 5. Welsh Ambulance Service NHS Trust, Cardiff, UK  
45  
46 24 6. Heart of England NHS Foundation Trust, Birmingham, UK  
47  
48 25 7. Cancer Research UK Clinical Trials Unit, University of Birmingham, Birmingham, UK  
49

50 **26 Correspondence to**

51  
52  
53 27 Professor Gavin Perkins; University of Warwick, Tel: +44 (0)24761 50925;  
54 28 [G.D.Perkins@warwick.ac.uk](mailto:G.D.Perkins@warwick.ac.uk)  
55



- 1
- 2
- 3 1 Word count
- 4
- 5 2 Abstract: 280
- 6
- 7 3 Main body: 3554 (excluding Tables/Figures/titles/notes/legends)
- 8
- 9
- 10
- 11
- 12
- 13
- 14
- 15
- 16
- 17
- 18
- 19
- 20
- 21
- 22
- 23
- 24
- 25
- 26
- 27
- 28
- 29
- 30
- 31
- 32
- 33
- 34
- 35
- 36
- 37
- 38
- 39
- 40
- 41
- 42
- 43
- 44
- 45
- 46
- 47
- 48
- 49
- 50
- 51
- 52
- 53
- 54
- 55
- 56
- 57
- 58
- 59
- 60

For peer review only

**Abstract**

*Objectives:* There is considerable interest in reducing the cost of clinical trials. Linkage of trial data to administrative datasets and disease-specific registries may improve trial efficiency, but has not been reported in resuscitation trials conducted in the UK. To assess the feasibility of utilising national administrative and clinical datasets to follow up patients transported to hospital following attempted resuscitation in a cluster randomised trial of a mechanical chest compression device in out of hospital cardiac arrest (OHCA).

*Methods:* Hospital data on trial participants were requested from Hospital Episode Statistics (HES); the Intensive Care National Audit and Research Centre (ICNARC); and Myocardial Ischaemia National Audit Project (MINAP) and National Audit of Percutaneous Coronary Intervention (NAPCI), using unique patient identifiers. Linked data were received between June 2014 and June 2015.

*Results:* Of 4471 patients randomised in the PARAMEDIC trial, 2398 (53.6%) were not known to be deceased at emergency department arrival and were eligible for linkage. We achieved an overall match rate of 86.7% in the combined HES A&E, inpatient and Critical care dataset, with variable match rates (4.2-80.4%) in individual datasets. Patient demographics, cardiac arrest related characteristics and major outcomes were predominantly similar between HES matched and unmatched groups, in the linkage apart from location, response time and ROSC at handover.

*Conclusions:* This study shows that it is feasible to track patients from the pre-hospital setting through to hospital admission using routinely available administrative datasets with a moderate to high degree of success. This approach has the potential to complement the trial data with the demographic and clinical management information about the studied cohort, as well as to improve the efficiency and reduce the costs of follow-up in cardiac arrest trials.

*ISRCTN08233942.*

1  
2  
3 **1 Strengths and limitations of this study**  
4

- 5 2 • First study evaluating the supplement of routinely collected administrative data in a cardiac  
6 3 arrest trial in the UK.  
7 4 • Data linkage was made to different UK national registries.  
8 5 • The matching reliability was suboptimal due to relaxed matching criteria, matching method  
9 6 and possible data quality issues.  
10 7 • Routine data were not fully available for all trial patients transported to hospital.  
11 8 • The findings of our study are not generalisable to facilitate trial recruitment since it was  
12 9 considered unrealistic in the clinical context of cardiac arrest.  
13  
14  
15  
16 10

17  
18  
19  
20  
21  
22  
23  
24  
25  
26  
27  
28  
29  
30  
31  
32  
33  
34  
35  
36  
37  
38  
39  
40  
41  
42  
43  
44  
45  
46  
47  
48  
49  
50  
51  
52  
53  
54  
55  
56  
57  
58  
59  
60

For peer review only

## 1 Background

2 Well conducted and reported randomised controlled trials (RCTs) are considered the gold standard  
3 in evaluation of new or established clinical interventions. In cardiac arrest resuscitation science, only  
4 a small minority (1%) of contemporary international guideline recommendations are based on the  
5 highest level of evidence from more than one RCT, meta-analysis of high quality RCTs, or RCTs  
6 corroborated by high quality registry studies.<sup>1</sup> High quality trials to address outcomes of interest to  
7 patients following cardiac arrest (e.g. long term survival, neurocognitive status and disability)<sup>2</sup> are  
8 complex, labour intensive and expensive to perform. Many studies in cardiac arrest are therefore  
9 too small or inadequately conducted (with a predominance of observational studies which are prone  
10 to bias) to provide reliable estimates of treatment effect or harm to patients. Consequently, for the  
11 majority of resuscitation interventions, there is a paucity of high quality evidence. Funders (typically  
12 government agencies) have called for proposals for low-cost, more efficient trials.<sup>3</sup>

13 Traditional trial methods of patient tracking and data access in individual hospitals is challenging  
14 with limited resources. Cardiovascular medicine has attempted to improve the efficiency of the trial  
15 design by pioneering the concept of registry-based randomised trials, using clinical quality registries  
16 and administrative datasets. In the Thrombus Aspiration during ST-Segment Elevation Myocardial  
17 Infarction (TASTE) trial, undertaken in Sweden, both patient enrolment and follow up were  
18 conducted using the Swedish Web System for Enhancement and Development of Evidence-based  
19 Care in Heart Disease Evaluated According to Recommended Therapies (SWEDEHEART) registry.<sup>4</sup> On  
20 publication, this registry-based trial was hailed as the '*next disruptive technology*' in clinical research,  
21 and as a new clinical trial paradigm.<sup>5 6</sup> Subsequent registry-based trials have been reported in a  
22 comparison of radial versus femoral access in women undergoing percutaneous coronary  
23 intervention in the United States,<sup>7</sup> and of supplemental oxygen versus ambient air in patients with  
24 suspected acute myocardial infarction in Sweden.<sup>8</sup>

25 To our knowledge, however, there are no reports of registry-based randomised trials in resuscitation  
26 science. However, should accessing registry data to ascertain outcomes in a prehospital cardiac  
27 arrest trial (e.g. length of stay/patient pathways/survival status) to be feasible, this could be one way  
28 of significantly improving efficiency and reducing costs of conducting high quality randomised trials  
29 in resuscitation.

30 In the PARAMEDIC trial, the in-hospital data collection process was complex, expensive and labour  
31 intensive, with research paramedics visiting multiple hospitals across large geographical areas to  
32 extract data from hospital records. Patients transported to hospital following resuscitation from  
33 cardiac arrest follow multiple clinical pathways depending on their clinical status and treatments. As

1 hospital data are routinely collected and managed by national registries, utilising these registries  
 2 could save resources and time in the in-hospital data collection and potentially reduce the burden  
 3 on patients and relatives in the sensitive period following cardiac arrest.

4 This paper reports our assessment of the feasibility of linking data collected for the purposes of  
 5 patient follow up in a pragmatic, cluster randomised controlled trial of a mechanical chest  
 6 compression device undertaken in the United Kingdom (UK) prehospital setting, with large national  
 7 administrative and specialist registries.

## 8 **Methods**

9 The PARAMEDIC trial examined the effectiveness of LUCAS-2, a mechanical chest compression  
 10 device, in 4471 patients with out of hospital cardiac arrest (OHCA). The study was a cluster  
 11 randomised trial whereby emergency medical service (EMS) vehicles were randomised to carry the  
 12 LUCAS-2 device (intervention) or not (control). Full details of the trial protocol have been published  
 13 previously.<sup>9</sup> In summary, adults with OHCA where resuscitation was attempted by EMS personnel  
 14 and attended by a trial vehicle were included. Patients with traumatic cardiac arrest or suspected to  
 15 be pregnant were excluded. Trial recruitment ran from April 15, 2010 to June 10, 2013. We have  
 16 previously reported primary outcome (30-day survival),<sup>10</sup> secondary outcomes,<sup>11</sup> an economic  
 17 analysis<sup>12</sup> and characteristics of patients who were not resuscitated.<sup>13</sup>

### 18 *Data sources*

19 The PARAMEDIC trial utilised four sources of data that were linked to the trial dataset: UK National  
 20 Health Service (NHS) Hospital Episodes Statistics (HES), Myocardial Ischaemia National Audit Project  
 21 (MINAP),<sup>14</sup> National Audit of Percutaneous Coronary Interventions (NAPCI),<sup>15</sup> and Case Mix  
 22 Programme (CMP)<sup>16</sup> to obtain data on hospital stay and treatment or procedures that trial patients  
 23 received in hospital.

24 We used the MINAP, NAPCI and CMP data for the health economic analysis<sup>12</sup> and long-term post  
 25 admission outcomes<sup>11</sup> and to validate the hospital length of stay or stay in the intensive care  
 26 (secondary outcomes for the efficacy part of the trial), and also to gain insight into the specifics of  
 27 the treatment or procedures that trial patients received during their hospital stay. Characteristics of  
 28 the registries are summarised in Table 1.

29 Table 1: Characteristics of registries, participation and case ascertainment.

| Registry/Dataset | Source | Description | Participation and case ascertainment* during the trial period |
|------------------|--------|-------------|---------------------------------------------------------------|
|------------------|--------|-------------|---------------------------------------------------------------|

|                                                               |                                                                 |                                                                                                                                                                                                                                                                                |                                                                    |
|---------------------------------------------------------------|-----------------------------------------------------------------|--------------------------------------------------------------------------------------------------------------------------------------------------------------------------------------------------------------------------------------------------------------------------------|--------------------------------------------------------------------|
| Paramedic trial                                               | Warwick Clinical Trials Unit                                    | Trial patient cohort that survived admission to a hospital                                                                                                                                                                                                                     | n/a                                                                |
| Hospital Episode Statistics (HES)                             | NHS Digital (NHS D)                                             | Collection of information on all NHS hospital inpatients, Accident and Emergency (A&E), critical care and outpatients which enables health care providers to be paid according to their levels of activity.                                                                    | All hospitals<br>Case ascertainment 100%                           |
| Case Mix Programme (CMP)                                      | Intensive Care National Audit and Research Centre (ICNARC)      | Audit of patient outcomes from all adult, general critical care units in England, Wales and Northern Ireland. Other specialist units, including neurosciences, cardiac and high dependency units, also participate                                                             | Over 90% of critical care units<br>Case ascertainment not reported |
| Myocardial Ischaemia National Audit Project (MINAP)           | National Institute for Cardiovascular Outcomes Research (NICOR) | National audit of patients with acute coronary syndrome admitted to all hospitals in England, Wales and Northern Ireland. Data are collected prospectively at each hospital by secure electronic system, electronically encrypted and transferred online to a central database | All hospitals<br>Case ascertainment not reported                   |
| NAPCI (National Audit of Percutaneous Coronary Interventions) | National Institute for Cardiovascular Outcomes Research (NICOR) | National audit of all PCI procedures from NHS and non-NHS hospitals in the United Kingdom.                                                                                                                                                                                     | All hospitals<br>Case ascertainment 97%                            |

1 Note: \*: Case ascertainment – Rate (e.g. %) of eligible cases included in a registry/database.

## 2 *Patient population*

3 Patients (denominator) for this linkage study were patients from the PARAMEDIC trial who were  
4 transported to hospital by EMS and not known to be deceased (i.e. documented as alive or unknown  
5 status) on arrival at the emergency department (ED).

6 Since NHS Digital, responsible for HES, only provides annual data up to 1<sup>st</sup> April each year, no data on  
7 trial patients recruited on or after 1<sup>st</sup> April 2013 had any HES data returned for this data request. We  
8 therefore limited our analysis of the linked registry data to patients recruited to the PARAMEDIC trial  
9 between April 2010 and March 2013.

## 10 *Study approvals*

11 The PARAMEDIC trial was approved by the Coventry Research Ethics Committee (reference  
12 09/H1210/69) and sponsored by the University of Warwick, UK. The study was conducted in  
13 accordance with the principles of Good Clinical Practice and the Mental Capacity Act (2005). Specific  
14 approval for access to personal data without consent and the data linkage reported in this paper was  
15 obtained from the Confidentiality Advisory Group, part of the Health Research Authority (reference:

1  
2  
3 1 ECC 2-02 (c)/2011). At the time of the study this activity was undertaken by the National Information  
4 Governance Board for Health and Social Care Ethics and Confidentiality Committee.

### 6 7 3 *Patient and public involvement*

8 4 Patient and public representatives (PPR) were invited to the Trial Steering Committee meetings  
9 during the development and conduct of the main trial. They agreed with the data collection via  
10 linkage to reduce the burden on patients and relatives. They were regularly informed of this study  
11 and other trial outputs. The results of this study will be disseminated in different ways, including  
12 presentation on the publicly accessible trial webpage.

### 16 17 9 *Data linkage procedure*

18 10 Data access applications were submitted to national administrative and disease registries between  
19 2012-2014 to request patient case mix and clinical variables (Supplementary Table 1). The following  
20 patient identifiers were sent to the NHSD, ICNARC and NICOR to identify their clinical records: trial  
21 number, cardiac arrest date, ambulance service case number, 999 call time, hospital name, hospital  
22 arrival time, hospital handover time, patient name, NHS number, home address and postcode. The  
23 trial data were linked to the two NICOR datasets (MINAP and NAPCI) on two separate occasions by a  
24 different member of NICOR staff, which reassuringly generated the same results. Extracted  
25 anonymous data were encrypted and sent back to the trial team between June 2014 and June 2015.

26  
27  
28 18 Linked data may contain multiple, non-event related hospital records within the requested linkage  
29 period. We firstly used patient cardiac arrest (trial event) date to identify the records with exactly  
30 matched admission/visit date in the respective data sources. However, event and admission dates  
31 could be different due to potential data definition discrepancies. For instance, a trial event could  
32 occur before midnight and the patient was admitted to hospital after midnight. Therefore, we  
33 relaxed the date match criterion to a 5-day range (date of cardiac arrest with +/- 2 days). A matched  
34 record was redefined as if the admission/visit date falls in the range. We considered the range would  
35 be sufficiently large to mitigate against any date discrepancies in different sources and also be  
36 reasonably small to reduce the chance of mismatch in the case of early re-admission. Where  
37 multiple records could be matched to a single trial event in the same routine dataset, separate rules  
38 were used to extract the retrieved information: 1) where a patient had multiple episodes in HES,  
39 only the one with recorded death or discharge date was retained. If a patient had not been  
40 discharged from hospital, the episode with latest ward admission date was used. 2) Where multiple  
41 admissions to ICU were recorded in CMP, only the first ICU admission was linked to a trial event. 3)  
42 Since the MINAP dataset provided to us by NICOR only contained year and month of admission, only  
43 the earliest admission was used. 4) Only the first procedure was included for the linkage to the  
44  
45  
46  
47  
48  
49  
50  
51  
52  
53  
54  
55  
56  
57  
58  
59  
60

1  
2  
3 1 NAPCI registry data, since patients can have more than one interventional procedure (and thus  
4 2 another record) during the index admission.

### 3 *Data linkage rate*

4 For HES data, we developed the linkage and match rate for linked and matched (or correctly linked)  
5 cases as follows:

$$7 \text{ HES linkage rate} = \frac{\text{N of patients with linked HES inpatient, Critical care or A\&E data}}{\text{N of patients not known to be deceased at ED}}$$

$$10 \text{ HES match rate} = \frac{\text{N of patients with matched (correctly linked) HES inpatient, Critical care or A\&E data}}{\text{N of patients not known to be deceased at ED}}$$

11  
12  
13 Similar equations were used to determine the rates for each of the datasets i.e. MINAP, NAPCI and  
14 CMP. As we were not able to confirm which patient should actually be collected in these datasets,  
15 we employed same denominator used in the above equations.

### 16 *Data linkage quality*

17 Match rank is an indicator used in HES to show the confidence of match: 1 suggests the best match  
18 and 8 the worst. Level 1-3 appear to be of high quality as cases are matched based on a combination  
19 of unique NHS number and data of date of birth, sex and home postcode. The quality of linkage in  
20 matched HES was therefore summarised on the basis of percentage of level 1-3.

### 21 *Data representativeness*

22 Data representativeness was assessed in two comparisons. The first comparison intended to assess  
23 whether the patients with correctly linked (i.e. matched) HES data could be representative of the  
24 trial population. It was carried out in patients with and without matched HES inpatient, Critical Care  
25 or A&E data (comparison 1). The second comparison intended to assess the difference between two  
26 critical care data sources. We were not able to compare data from these two sources directly as  
27 some patient care data were collected in both databases. Hence, we split the patients by their linked  
28 data sources and made the comparison between patients with HES Critical Care only, with CMP data  
29 only and with both HES Critical Care and CMP data (comparison 2).

30 For both comparisons, we compared patient and event characteristics between the datasets.  
31 Continuous variables were compared using Mann-Whitney test in comparison 1 and Kruskal-Wallis  
32 test in comparison 2. Categorical variables were compared using Chi-square test. A two-sided p



1  
2  
3 1 value <0.05 was considered statistically significant. All analyses were conducted in SAS v9.3 (Cary,  
4 2 NC, USA).

### 5 6 7 3 *Data security and destruction*

8 4 We followed the Warwick Clinical Trials Unit Standard Operating Procedures (SOPs) for data storage,  
9 5 transfer, and data sharing. The data were retained and destroyed in accordance with relevant  
10 6 regulations and the University of Warwick's Data Sharing Agreements.

## 11 12 13 14 7 **Results**

15  
16  
17 8 In the PARAMEDIC trial, 2695 patients were transported to hospital and not known to be deceased  
18 9 at ED. Of these 2398 (89.0%) were recruited between April 2010 and March 2013 and were  
19 10 therefore included in this study (referred to as "linkage patients"). The data requests to NHSD,  
20 11 ICNARC and NICOR retrieved different numbers of patient clinical records.

### 21 22 23 24 12 *Summary of the linkage*

25  
26 13 The flow chart of the linkage to HES is shown in Figure 1. The linkage patients were grouped into ICU  
27 14 admitted (patients with matched HES Critical care data) and not admitted (patients with other  
28 15 matched HES data). Meanwhile, patients with matched CMP data were also summarised in the  
29 16 flowchart. This presented a comparison between CMP and HES Critical Care. 303 patients were  
30 17 matched in both CMP and HES Critical Care. Overall, the linkage to HES data achieved a match rate  
31 18 of 86.7% (2079 of 2398) with allowed variation in dates (date of cardiac arrest with +/- 2 days),  
32 19 slightly improved from the use of exact date match approach (84.1%).

33  
34  
35  
36  
37 20 Linkage quality was high in matched cases: level 1-3 accounted for 97.9%. In unmatched cases,  
38 21 91.5% (292 of 319) had no linked HES data and the rest, while linked with non-trial even related  
39 22 data, had a good match rank ( $\leq 3$ ).

40  
41  
42  
43 23 The summary of linkage and match rate in each dataset are shown in Table 2. All datasets contained  
44 24 multiple linked records, indicating some patients had been linked to multiple admissions with  
45 25 possible multiple episodes. Among the 2398 linkage patients, individual match rate varied depending  
46 26 on the hospitalisation stage and received treatments. HES A&E had the highest individual match rate  
47 27 (80.4%). In the patients admitted to ICU, CMP provided 53 more matched patients with a lower  
48 28 proportion of unmatched data in linked patients compared to HES Critical Care.

49  
50  
51  
52  
53 29

54  
55 30 *Figure 1: Linkage match rate and flowchart of patients retrieving HES or CMP data.*

Table 2: Summary of linked PARAMEDIC trial patients to the respective registry databases

| Data source | Dataset           | Number of linked records | Number of linked patients (linkage rate)* | Number of matched patients (match rate)* |
|-------------|-------------------|--------------------------|-------------------------------------------|------------------------------------------|
| NHSD        | HES Inpatient     | 12875                    | 1617 (67.4%)                              | 771 (32.2%)                              |
|             | HES Critical care | 545                      | 433 (18.1%)                               | 354 (14.8%)                              |
|             | HES A&E           | 6434                     | 2186 (91.2%)                              | 1927 (80.4%)                             |
|             | Overall           | 19854                    | 2277 (95.0%)                              | 2079 (86.7%)                             |
| ICNARC      | CMP               | 435                      | 410 (17.1%)                               | 407 (17.0%)                              |
| NCAP        | MINAP             | 244                      | 218 (9.1%)                                | 182 (7.6%)                               |
|             | PCI               | 153                      | 128 (5.3%)                                | 101 (4.2%)                               |

Note: \*: Percentage is calculated using the number in the column divided by 2398 linkage patients.

A summary of retrieved information for each linked dataset as well as the degree of data missingness for each field is available in the online supplementary materials. In Supplementary Table 2, the trial patients that had not been matched to the HES records were similar to those that with matched records in age (mean age 71.8 and 73.6 respectively), male (67.4% and 63.3% respectively were male). They were also similar between groups in initial cardiac arrest aetiology where most were of cardiac origin (85.3% and 85.9% respectively) and in initial rhythm (shockable rhythm 31.0% and 31.3%). Patients with unmatched data were more likely to have had a cardiac arrest in a public place (27.9%) compared with of those with matched records (16%), witnessed by bystander (53.3% versus 46.3%) and had longer EMS response time (7.2 versus 6.1 minutes). Supplementary Table 3 illustrates the comparison of demographic and event characteristics of patients with matched HES Critical Care and CMP data. Characteristics were similar in all three groups, except for a significant difference in the EMS response time.

## Discussion

This study aimed to demonstrate the feasibility of collecting trial outcome data during patient follow up in a prehospital cardiac arrest trial via linkage to national registries. We achieved an overall match rate of 86.7% in 2398 patients using HES data. The data linkage provided important administrative and additional clinical data that allowed extended analyses of the intervention effect and provided more details of patient journey in the trial. We also evaluated the representativeness of retrieved HES and CMP data by comparing patient and trial event characteristics. No substantial difference

1 was found in patients with and without matched HES inpatient, Critical Care or A&E data, as well as  
2 in patients with matched HES Critical Care only, CMP only and both datasets.

3 This was the first study evaluating the supplement of routinely collected administrative data in a  
4 cardiac arrest trial in the UK. Our match rate was in line with observational studies linking EMS data  
5 to hospital records,<sup>17-20</sup> and data validation studies.<sup>21</sup> Our experience suggests it is feasible to obtain  
6 relevant data from administrative databases in a cardiac arrest trial. In addition to the high match  
7 rate reported in this paper, the matched data are deemed to be sufficiently representative of the  
8 trial population. The comparison between patients with and without matched HES showed low level  
9 of imbalance of event characteristics. We have found similar results in the matched ICU data.

10 The unmatched cases were likely to be associated with missing or inaccurate data. Data quality could  
11 be at increased risk due to the challenging circumstances of cardiac arrest and complexity of patient  
12 handling following hospital arrival. In addition, routine data in the chosen registries are not  
13 systematically adjudicated. Lack of clinical engagement may compromise the case ascertainment  
14 and data quality,<sup>22</sup> leading to suboptimal linkage. NHS Digital employs deterministic and probabilistic  
15 methods in the data linkage. The latter calculates probability weight based on combinations of  
16 linkage variables and determines linkage based on a cut-off threshold. Although this method largely  
17 improves the linkage, it could incorrectly link record pairs and miss valid ones, undermining the  
18 reliability of linkage.

19 Linkage to individual routine datasets resulted in variable match rates. HES A&E generated the  
20 highest rate of 80.4% as most patients were taken by EMS to ED for assessment before being  
21 admitted to specialist hospital units. Other rates reflected the proportion of specific groups of  
22 patients in the linkage. The CMP, MINAP and NAPCI registries are focused on selected patients with  
23 a specific diagnosis and/or requiring specialist care, reflected in strict inclusion and exclusion criteria;  
24 for example MINAP comprises data on patients with suspected and/or confirmed acute coronary  
25 syndrome, NAPCI on interventional cardiology whilst CMP registry collects data on patients admitted  
26 to critical care/intensive care units within any given hospital. In this study, MINAP and NAPCI  
27 generated 9.1% and 5.3% respectively. Patients who die in the ED are less likely to be recorded on  
28 MINAP, and only those patients receiving interventional cardiology are recorded in NAPCI.

29 Use of routine data has the potential to reduce the costs of conducting trials. The cost of the TASTE  
30 trial was reported as US\$300,000, or approximately \$50 per patient,<sup>4</sup> 2 per cent of the cost of a  
31 traditional randomised trial, but differs from the PARAMEDIC trial in that we did not use registry  
32 data to identify and recruit patients in the challenging and time-pressured setting of our-of-hospital  
33 cardiac arrest. In the West of Scotland Coronary Prevention (WOSCOPS) trial, data linkage reduced

1 costs of long term follow up to less than one per cent of trial budget.<sup>23</sup> However, the time cost of  
2 linkage could be unrealistic for some trials. Linkage for the PARAMEDIC trial took up to three years  
3 from application to the trial team obtaining the data. It has been suggested that NHS Digital, who  
4 performed the linkage to HES for our study was overwhelmed with data linkage applications.<sup>24</sup> This  
5 may limit the usefulness of administrative data in trials with funder-imposed deadlines for  
6 completion.

### 7 *Limitations:*

8 Our study had several limitations. The matching reliability was suboptimal due to relaxed matching  
9 criteria (using range of event date), matching methods and potential issues of data quality and  
10 completeness, common to administrative data. Bohensky et al.<sup>25</sup> conducted an evidence synthesis of  
11 data linkage studies and identified factors such as sub-optimal or incomplete linkage leading to  
12 systematic bias. They considered the participant or population characteristics that can influence the  
13 validity and completeness of data linkage and may in turn lead to systematic bias in reporting. They  
14 reported variation in quality of data linkage across geographical/hospital sites, which could be due to  
15 high staff turnover or not sufficient resources allocated to the data collection and/or coding. We  
16 have not considered such variations in this study, but overall match quality was high in the matched  
17 cases.

18 Secondly, routine data were not fully available for all patients transported to hospital. Some patients  
19 were not included in the linkage as their data were not available in HES at the time of our data  
20 application. Although no substantial bias was shown, the generalisability of results could be limited.  
21 Several data fields were incomplete, for example, MINAP captures most ST elevation myocardial  
22 infarction (STEMI) cases but data for non-STEMI are less complete. We also cannot confirm how  
23 many patients required specialist care and should be included in non-HES datasets. Therefore, we  
24 were unable to assess and report the impact of unmatched cases in in the linkage to these registries.

25 Thirdly, we used the first matched admission without considering repeated or later admissions. We  
26 were therefore unlikely to fully describe patients' hospital pathway based on matched information.

27 Fourthly, our focus for the present study was on assessing the feasibility of using administrative data  
28 for purposes of follow-up. We did not assess the utility of administrative data to facilitate  
29 recruitment of trial patients since this was considered unrealistic in the clinical context of cardiac  
30 arrest.

31 Fifthly, we did not assess the financial cost of manual data collection at hospitals to compare with  
32 the cost of the use of registries in the trial linkage.

## 1 *Recommendations*

2 Based on our experience, we made the following recommendations to improve the use of data  
3 linkage in trials:

- 4 1. When planning a trial using linkage to administrative registries, careful planning is required  
5 to assess availability of the required data. Linkage to routine data in different jurisdictions or  
6 multiple registries requires separate applications for data release and may be subject to data  
7 availability.
- 8 2. Trialists need to be mindful of prolonged processes for regulatory approvals, data release  
9 and validation. These processes may extend beyond trial funding.
- 10 3. Data linkage is a lengthy often unpredictable process in the application stage, possibly due  
11 to the restricted capacity of registries funded primarily to assess quality of care. Most  
12 registries in the NHS are funded as national audits and do not have sufficient resources for  
13 the timely processing of data sharing requests.
- 14 4. The quality of routinely collected data in the national registries may be inferior to that  
15 collected using traditional trial processes. Registry data are collected in high volume with  
16 limited resources and the validation process is unlikely to be as robust as in trials that are  
17 better resourced. Moreover, collected variables in registries are reviewed periodically and  
18 may change to reflect advances in clinical practice, which can impact on data completeness.  
19 Therefore, we suggest that trialists use registry data as the main source of all in-hospital  
20 data points and active data collection by a study team as an auxiliary approach to collect  
21 data for the unmatched patients.
- 22 5. It is common for registries to charge a fee for data release, which should be costed in to trial  
23 budgets.

## 24 **Conclusions**

25 This study shows that it is feasible to track patients from the pre-hospital setting through to hospital  
26 admission using routinely available administrative datasets with a moderate to high degree of  
27 success. This may improve the efficiency and reduce the costs for longer-term follow-up in cardiac  
28 arrest trials.

29

## 1 **Declaration of interests**

2 GDP, RL, TQ, CDD and SG report grants from NIHR HTA Programme during the conduct of the study.

3 The other authors declare no competing interests.

## 4 **Author's contributions**

5 CS, JH, SG and GDP led on the data linkage. CJ analysed data. CJ, TQ and LG drafted the manuscript  
6 with input from the co-authors; RL, CS, JH, CDD, HP, MAS, NR, SJM, SG and GDP reviewed the  
7 manuscript. All authors approved the final version.

## 10 **Acknowledgments**

11 This is a summary of independent research partly funded by the National Institute for Health  
12 Research's (NIHR) Health Technology Assessment Programme (Grant Reference Number HTA-  
13 07/37/69). The views expressed are those of the author(s) and not necessarily those of the NHS, the  
14 NIHR, of the Department of Health. GDP received support as a NIHR Senior Investigator. MS is  
15 supported as an NIHR Doctoral Research Fellow. We thank the independent members of the Trial  
16 Steering Committee (Jon Nicholl, Helen Snooks, Fionna Moore, Alasdair Gray, Martyn Box, Father  
17 Neil Bayliss (PPR), and John Long (PPR)) and the Data Monitoring Committee (Marion Campbell, Jerry  
18 Nolan, and Kathy Rowan). We acknowledge support from the OHCAO registry project that is funded  
19 by the British Heart Foundation and Resuscitation Council (UK).

## 20 **Data sharing statement**

21 No additional data sharing available.

1

2 **References**

- 3 1. Neumar RW, Shuster M, Callaway CW, et al. Part 1: Executive Summary: 2015 American Heart  
4 Association Guidelines Update for Cardiopulmonary Resuscitation and Emergency  
5 Cardiovascular Care. *Circulation* 2015;**132**(18 Suppl 2):S315-67. doi:  
6 10.1161/CIR.0000000000000252
- 7 2. Whitehead L, Perkins GD, Clarey A, et al. A systematic review of the outcomes reported in cardiac  
8 arrest clinical trials: the need for a core outcome set. *Resuscitation* 2015;**88**:150-7. doi:  
9 10.1016/j.resuscitation.2014.11.013
- 10 3. Lauer MS, Bonds D. Eliminating the "expensive" adjective for clinical trials. *Am Heart J*  
11 2014;**167**(4):419-20. doi: 10.1016/j.ahj.2013.12.003
- 12 4. Frobert O, Lagerqvist B, Olivecrona GK, et al. Thrombus aspiration during ST-segment elevation  
13 myocardial infarction. *N Engl J Med* 2013;**369**(17):1587-97. doi: 10.1056/NEJMoa1308789
- 14 5. James S, Rao SV, Granger CB. Registry-based randomized clinical trials--a new clinical trial  
15 paradigm. *Nat Rev Cardiol* 2015;**12**(5):312-6. doi: 10.1038/nrcardio.2015.33
- 16 6. Lauer MS, D'Agostino RB, S.r. The randomized registry trial--the next disruptive technology in  
17 clinical research? *N Engl J Med* 2013;**369**(17):1579-81. doi: 10.1056/NEJMp1310102
- 18 7. Rao SV, Hess CN, Barham B, et al. A registry-based randomized trial comparing radial and femoral  
19 approaches in women undergoing percutaneous coronary intervention: the SAFE-PCI for  
20 Women (Study of Access Site for Enhancement of PCI for Women) trial. *JACC Cardiovasc*  
21 *Interv* 2014;**7**(8):857-67. doi: 10.1016/j.jcin.2014.04.007
- 22 8. Hofmann R, James SK, Svensson L, et al. DETermination of the role of OXYgen in suspected Acute  
23 Myocardial Infarction trial. *Am Heart J* 2014;**167**(3):322-8. doi: 10.1016/j.ahj.2013.09.022
- 24 9. Perkins GD, Woollard M, Cooke MW, et al. Prehospital randomised assessment of a mechanical  
25 compression device in cardiac arrest (PaRAMeDIC) trial protocol. *Scand J Trauma Resusc*  
26 *Emerg Med* 2010;**18**:58. doi: 10.1186/1757-7241-18-58
- 27 10. Perkins GD, Lall R, Quinn T, et al. Mechanical versus manual chest compression for out-of-  
28 hospital cardiac arrest (PARAMEDIC): a pragmatic, cluster randomised controlled trial.  
29 *Lancet* 2015;**385**(9972):947-55. doi: 10.1016/S0140-6736(14)61886-9
- 30 11. Ji C, Lall R, Quinn T, et al. Post-admission outcomes of participants in the PARAMEDIC trial: A  
31 cluster randomised trial of mechanical or manual chest compressions. *Resuscitation*  
32 2017;**118**:82-88. doi: 10.1016/j.resuscitation.2017.06.026
- 33 12. Marti J, Hulme C, Ferreira Z, et al. The cost-effectiveness of a mechanical compression device in  
34 out-of-hospital cardiac arrest. *Resuscitation* 2017;**117**:1-7. doi:  
35 10.1016/j.resuscitation.2017.04.036
- 36 13. Rajagopal S, Kaye CR, Lall R, et al. Characteristics of patients who are not resuscitated in out of  
37 hospital cardiac arrests and opportunities to improve community response to cardiac arrest.  
38 *Resuscitation* 2016;**109**:110-15. doi: 10.1016/j.resuscitation.2016.09.014
- 39 14. Herrett E, Smeeth L, Walker L, et al. The Myocardial Ischaemia National Audit Project (MINAP).  
40 *Heart* 2010;**96**(16):1264-7. doi: 10.1136/hrt.2009.192328
- 41 15. Ludman PF, de Belder MA, McLenachan JM, et al. The importance of audit to monitor  
42 applications of procedures and improve primary angioplasty results. *EuroIntervention*  
43 2012;**8 Suppl P**:P62-70. doi: 10.4244/EIJV8SPA11
- 44 16. Harrison DA, Brady AR, Rowan K. Case mix, outcome and length of stay for admissions to adult,  
45 general critical care units in England, Wales and Northern Ireland: the Intensive Care  
46 National Audit & Research Centre Case Mix Programme Database. *Crit Care* 2004;**8**(2):R99-  
47 111. doi: 10.1186/cc2834
- 48 17. Boyle MJ. The experience of linking Victorian emergency medical service trauma data. *BMC Med*  
49 *Inform Decis Mak* 2008;**8**:52. doi: 10.1186/1472-6947-8-52

- 1  
2  
3 1 18. Seymour CW, Kahn JM, Martin-Gill C, et al. Creating an infrastructure for comparative  
4 2 effectiveness research in emergency medical services. *Acad Emerg Med* 2014;**21**(5):599-607.  
5 3 doi: 10.1111/acem.12370  
6 4 19. Mears GD, Rosamond WD, Lohmeier C, et al. A link to improve stroke patient care: a successful  
7 5 linkage between a statewide emergency medical services data system and a stroke registry.  
8 6 *Acad Emerg Med* 2010;**17**(12):1398-404. doi: 10.1111/j.1553-2712.2010.00925.x  
9 7 20. Hettinger AZ, Cushman JT, Shah MN, et al. Emergency medical dispatch codes association with  
10 8 emergency department outcomes. *Prehosp Emerg Care* 2013;**17**(1):29-37. doi:  
11 9 10.3109/10903127.2012.710716  
12 10 21. Barry SJ, Dinnett E, Kean S, et al. Are routinely collected NHS administrative records suitable for  
13 11 endpoint identification in clinical trials? Evidence from the West of Scotland Coronary  
14 12 Prevention Study. *PLoS One* 2013;**8**(9):e75379. doi: 10.1371/journal.pone.0075379  
15 13 22. Li G, Sajobi TT, Menon BK, et al. Registry-based randomized controlled trials- what are the  
16 14 advantages, challenges, and areas for future research? *J Clin Epidemiol* 2016;**80**:16-24. doi:  
17 15 10.1016/j.jclinepi.2016.08.003  
18 16 23. McCowan C. Using routinely collected clinical data to support clinical trials: a view from Scotland.  
19 17 Proceedings from the Clinical Trials Ontario 2015 Clinical Trials Conference 04-05 March  
20 18 2015. [http://www.ctontario.ca/cms/media/cto-2015-conference-speaker-](http://www.ctontario.ca/cms/media/cto-2015-conference-speaker-presentation_colin-mccowan.pdf)  
21 19 [presentation\\_colin-mccowan.pdf](http://www.ctontario.ca/cms/media/cto-2015-conference-speaker-presentation_colin-mccowan.pdf) (accessed 29 November 2017).  
22 20 24. Filippou J. Slow and costly access to anonymised patient data impedes academic research. *BMJ*  
23 21 2015;**351**:h5087. doi: 10.1136/bmj.h5087  
24 22 25. Bohensky MA, Jolley D, Sundararajan V, et al. Data linkage: a powerful research tool with  
25 23 potential problems. *BMC Health Serv Res* 2010;**10**:346. doi: 10.1186/1472-6963-10-346  
26  
27  
28  
29  
30  
31  
32  
33  
34  
35  
36  
37  
38  
39  
40  
41  
42  
43  
44  
45  
46  
47  
48  
49  
50  
51  
52  
53  
54  
55  
56  
57  
58  
59  
60



1  
2  
3  
4  
5  
6  
7  
8  
9  
10  
11  
12  
13  
14  
15  
16  
17  
18  
19  
20  
21  
22  
23  
24  
25  
26  
27  
28  
29  
30  
31  
32  
33  
34  
35  
36  
37  
38  
39  
40  
41  
42  
43  
44  
45  
46  
47  
48  
49  
50  
51  
52  
53  
54  
55  
56  
57  
58  
59  
60

For peer review only

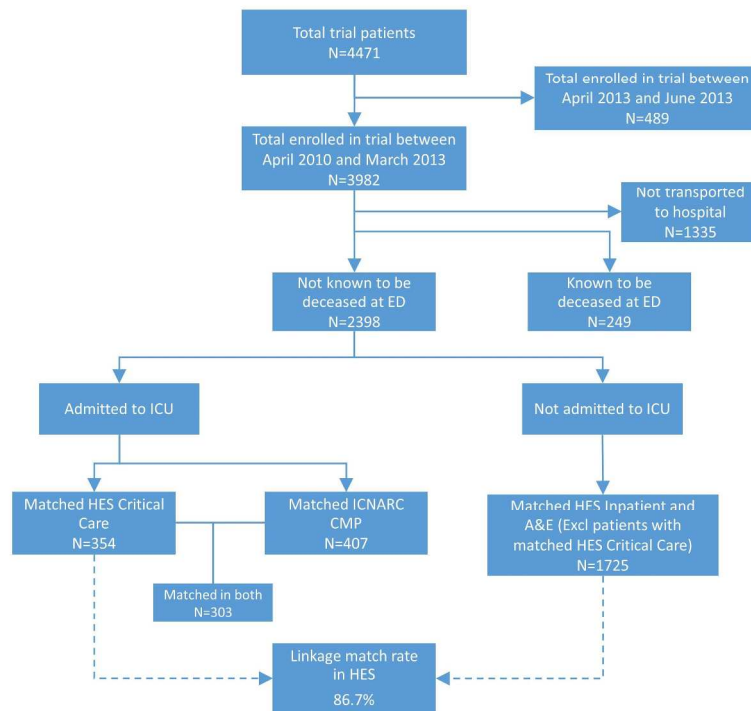

Figure 1: Linkage match rate and flowchart of patients retrieving HES or CMP data.

Legend: ICU, intensive care unit; ICNARC, Intensive Care National Audit and Research Centre; CMP, Case Mix Programme, HES, Hospital Episode Statistics; ED, Emergency Department; A&E, Accident and Emergency.

254x190mm (300 x 300 DPI)

## Supplementary materials:

Supplementary Table 1: Summary of retrieved information in each linked dataset.

| HES Inpatient            |                                                                                                                       | All         |
|--------------------------|-----------------------------------------------------------------------------------------------------------------------|-------------|
| CSK operation            | No                                                                                                                    | 606 (79.6%) |
|                          | Yes                                                                                                                   | 155 (20.4%) |
| Destination of discharge | The usual place of residence, including no fixed abode                                                                | 192 (24.9%) |
|                          | Temporary place of residence when usually resident elsewhere                                                          | 4 (0.5%)    |
|                          | Repatriation from high security psychiatric hospital (from 1999-2000)                                                 | 0 (0.0%)    |
|                          | Repatriation from high security psychiatric hospital (from 1999-2000)                                                 | 0 (0.0%)    |
|                          | Penal establishment - court (from 1999-2000)                                                                          | 0 (0.0%)    |
|                          | Penal establishment - police station (from 1999-2000)                                                                 | 0 (0.0%)    |
|                          | Penal establishment - court and police station excluded (from 1999-2000 to 2006-07)                                   | 0 (0.0%)    |
|                          | High security psychiatric hospital, Scotland (from 1999-2000)                                                         | 0 (0.0%)    |
|                          | NHS other hospital provider - high security psychiatric accommodation                                                 | 0 (0.0%)    |
|                          | NHS other hospital provider - medium secure unit (from 1999-2000)                                                     | 32 (4.2%)   |
|                          | NHS other hospital provider - ward for maternity patients or neonates                                                 | 0 (0.0%)    |
|                          | NHS other hospital provider - ward for patients who are mentally ill or have learning disabilities                    | 0 (0.0%)    |
|                          | NHS run nursing home, residential care home or group home                                                             | 3 (0.4%)    |
|                          | Local authority Part 3 residential accommodation - where care is provided (from 1996-97)                              | 0 (0.0%)    |
|                          | Local authority foster care, but not in Part 3 residential accommodation - where care is provided (from 1996-97)      | 0 (0.0%)    |
|                          | LA home or care (1989-90 to 1995-96)                                                                                  | 0 (0.0%)    |
|                          | Non-NHS run hospital - medium secure unit (from 2003-04)                                                              | 1 (0.1%)    |
|                          | Non-NHS (other than local authority) run residential care home (from 1996-97 to 2003-04) and care home (from 2003-04) | 3 (0.4%)    |
|                          | Non-NHS (other than local authority) run nursing home (from 1996-97 to 2003-04)                                       | 0 (0.0%)    |
|                          | Non-NHS run hospital                                                                                                  | 0 (0.0%)    |
|                          | Non-NHS (other than local authority) run hospice                                                                      | 2 (0.3%)    |
|                          | Non-NHS institution (1989-90 to 1995-96)                                                                              | 0 (0.0%)    |
|                          | Not applicable                                                                                                        | 7 (0.9%)    |
| Not known                | 1 (0.1%)                                                                                                              |             |
| Died                     | 522 (67.7%)                                                                                                           |             |
| Method of discharge      | Discharged on clinical advice or with clinical consent                                                                | 234 (30.4%) |
|                          | Self discharged, or discharged by a relative or advocate                                                              | 5 (0.6%)    |

|                                    |                                                                                     |              |
|------------------------------------|-------------------------------------------------------------------------------------|--------------|
|                                    | Discharged by a mental health review tribunal, the Home Secretary or a court        | 0 (0.0%)     |
|                                    | Baby was still born                                                                 | 0 (0.0%)     |
|                                    | Not applicable: patient still in hospital                                           | 10 (1.3%)    |
|                                    | Not known: a validation error                                                       | 0 (0.0%)     |
|                                    | Died                                                                                | 522 (67.7%)  |
| IMD 2004 index                     | Missing                                                                             | 84 (10.9%)   |
|                                    | Least deprived 10%                                                                  | 64 (8.3%)    |
|                                    | Less deprived 10-20%                                                                | 43 (5.6%)    |
|                                    | Less deprived 20-30%                                                                | 47 (6.1%)    |
|                                    | Less deprived 30-40%                                                                | 35 (4.5%)    |
|                                    | Less deprived 40-50%                                                                | 50 (6.5%)    |
|                                    | More deprived 10-20%                                                                | 80 (10.4%)   |
|                                    | More deprived 20-30%                                                                | 84 (10.9%)   |
|                                    | More deprived 30-40%                                                                | 58 (7.5%)    |
|                                    | More deprived 40-50%                                                                | 61 (7.9%)    |
|                                    | Most deprived 10%                                                                   | 165 (21.4%)  |
| Hospital length of stay*           |                                                                                     | 7.7 (20.3)   |
| <b>HES A&amp;E</b>                 |                                                                                     | <b>All</b>   |
| A&E department type - A&E only     | Emergency departments                                                               | 1865 (96.8%) |
|                                    | Consultant-led mono specialty accident and emergency service'                       | 0 (0.0%)     |
|                                    | Other type of A&E. Excludes NHS walk-in centres                                     | 4 (0.2%)     |
|                                    | NHS walk-in centres                                                                 | 1 (0.1%)     |
|                                    | Not known                                                                           | 57 (3.0%)    |
| A&E attendance disposal - A&E only | Admitted to hospital bed / became a lodged patient of the same health care provider | 560 (29.1%)  |
|                                    | Discharged – follow-up treatment to be provided by general practitioner             | 5 (0.3%)     |
|                                    | Discharged – did not require any follow-up treatment                                | 9 (0.5%)     |
|                                    | Referred to A&E clinic                                                              | 13 (0.7%)    |
|                                    | Referred to fracture clinic                                                         | 1 (0.1%)     |
|                                    | Referred to other outpatient clinic                                                 | 1 (0.1%)     |
|                                    | Transferred to other healthcare provider                                            | 28 (1.5%)    |
|                                    | Referred to other healthcare professional                                           | 6 (0.3%)     |
|                                    | Left department before being treated                                                | 1 (0.1%)     |
|                                    | Left department having refused treatment                                            | 0 (0.0%)     |
|                                    | Other                                                                               | 5 (0.3%)     |
|                                    | Not known                                                                           | 2 (0.1%)     |
|                                    | Died in department                                                                  | 1296 (67.3%) |
| IMD 2004 index                     | Missing                                                                             | 7 (0.4%)     |
|                                    | Least deprived 10%                                                                  | 126 (6.5%)   |
|                                    | Less deprived 10-20%                                                                | 95 (4.9%)    |
|                                    | Less deprived 20-30%                                                                | 139 (7.2%)   |
|                                    | Less deprived 30-40%                                                                | 120 (6.2%)   |

|                                                                           |                                    |             |
|---------------------------------------------------------------------------|------------------------------------|-------------|
|                                                                           | Less deprived 40-50%               | 133 (6.9%)  |
|                                                                           | More deprived 10-20%               | 257 (13.3%) |
|                                                                           | More deprived 20-30%               | 213 (11.1%) |
|                                                                           | More deprived 30-40%               | 173 (9.0%)  |
|                                                                           | More deprived 40-50%               | 205 (10.6%) |
|                                                                           | Most deprived 10%                  | 459 (23.8%) |
| <b>HES Critical care</b>                                                  |                                    | <b>All</b>  |
| Length of level 2 CC days                                                 |                                    | 0.9 (1.7)   |
| Length of level 3 CC days                                                 |                                    | 4.4 (5.4)   |
| Total length of CC days                                                   |                                    | 6.6 (15.4)  |
| <b>ICNARC CMP</b>                                                         |                                    | <b>All</b>  |
| Length of level 0 ITU days                                                |                                    | 0 (0.3)     |
| Length of level 1 ITU days                                                |                                    | 0.1 (0.6)   |
| Length of level 2 ITU days                                                |                                    | 1.1 (4.0)   |
| Length of level 3 ITU days                                                |                                    | 5.2 (9.4)   |
| Total length of ITU days                                                  |                                    | 6.5 (12.9)  |
| Total length of ITU days in 30 days survived patients                     |                                    | 10.5 (22.0) |
| Total length of ITU days in 30 days deceased patients                     |                                    | 4.8 (4.5)   |
| Days of alive and free of ITU stay in the first 28 days of cardiac arrest |                                    | 6.9 (10.3)  |
| Treatment withheld/withdrawn                                              | Both withheld then withdrawn       | 23 (5.7%)   |
|                                                                           | Withheld                           | 4 (1.0%)    |
|                                                                           | Withdrawn                          | 133 (32.7%) |
|                                                                           | Neither                            | 247 (60.7%) |
| Organ donation                                                            | Heartbeating solid organ donor     | 13 (3.2%)   |
|                                                                           | No solid organs or tissues donated | 199 (48.9%) |
|                                                                           | Non-heartbeating solid organ donor | 15 (3.7%)   |
|                                                                           | Tissue donor only                  | 8 (2.0%)    |
| <b>NICOR MINAP</b>                                                        |                                    | <b>All</b>  |
| Admission Diagnosis                                                       | Definite myocardial infarction     | 126 (69.2%) |
|                                                                           | Acute coronary syndrome            | 30 (16.5%)  |
|                                                                           | Chest pain cause                   | 4 (2.2%)    |
|                                                                           | Other initial diagnosis            | 22 (12.1%)  |
| Admission Ward                                                            | Missing                            | 1 (0.5%)    |
|                                                                           | Cardiac care unit                  | 94 (51.6%)  |
|                                                                           | Acute admissions unit              | 6 (3.3%)    |
|                                                                           | General medical ward               | 1 (0.5%)    |
|                                                                           | Intensive therapy unit             | 69 (37.9%)  |
|                                                                           | Other                              | 9 (4.9%)    |
|                                                                           | Cardiac ward (non CCU)             | 1 (0.5%)    |
|                                                                           | Stepdown ward                      | 0 (0.0%)    |
|                                                                           | Unknown                            | 0 (0.0%)    |
| Died in A&E                                                               | 1 (0.5%)                           |             |

|                                         |                                                             |             |
|-----------------------------------------|-------------------------------------------------------------|-------------|
| Initial Reperfusion Treatment           | Missing                                                     | 3 (2.2%)    |
|                                         | None                                                        | 18 (13.1%)  |
|                                         | Thrombolytic treatment                                      | 0 (0.0%)    |
|                                         | pPCI in house                                               | 116 (84.7%) |
|                                         | Referred for consideration for pPCI elsewhere               | 0 (0.0%)*   |
|                                         | Unknown                                                     | 0 (0.0%)    |
| Procedure performed                     | Missing                                                     | 30(21.9%)   |
|                                         | No angiogram                                                | 2 (1.5%)    |
|                                         | Angiogram but no PCI                                        | 9 (6.6%)    |
|                                         | Angiogram and PCI                                           | 96 (70.1%)  |
|                                         | Unknown                                                     | 0 (0.0%)    |
| Coronary angiography                    | Missing                                                     | 1(2.9%)     |
|                                         | Protocol driven investigation performed in this hospital    | 12(35.3%)   |
|                                         | Symptom driven investigation performed in this hospital     | 7 (20.6%)   |
|                                         | Protocol driven investigation performed at another hospital | 0 (0.0%)    |
|                                         | Symptom driven investigation performed at another hospital  | 0 (0.0%)    |
|                                         | Planned after discharge                                     | 0 (0.0%)    |
|                                         | Not applicable                                              | 9 (6.6%)    |
|                                         | Patient refused                                             | 1 (2.9%)    |
|                                         | Not performed                                               | 5 (14.7%)   |
| Unknown                                 | 0 (0.0%)                                                    |             |
| Coronary intervention                   | Missing                                                     | 6 (17.6%)   |
|                                         | Percutaneous coronary intervention                          | 9 (26.5%)   |
|                                         | CABG                                                        | 0 (0.0%)    |
|                                         | PCI planned after discharge                                 | 0 (0.0%)    |
|                                         | CABG planned after discharge                                | 1(2.9%)     |
|                                         | Not applicable                                              | 5 (14.7%)   |
|                                         | Patient refused                                             | 1 (2.9%)    |
|                                         | Not performed or arranged                                   | 11 (32.4%)  |
|                                         | Unknown                                                     | 0 (0.0%)    |
| Assessment at non-interventional centre | Missing                                                     | 5 (2.7%)    |
|                                         | No contact with a non interventional hospital               | 126 (69.2%) |
|                                         | Patient remains in ambulance                                | 0 (0.0%)    |
|                                         | A&E                                                         | 30 (16.5%)  |
|                                         | Acute assessment unit                                       | 2 (1.1%)    |
|                                         | CCU / cardiac facility                                      | 1 (0.5%)    |
|                                         | Self referral                                               | 0 (0.0%)    |
|                                         | Already in hospital                                         | 2 (1.1%)    |
|                                         | Other                                                       | 0 (0.0%)    |
| Unknown                                 | 16 (8.8%)                                                   |             |
| Assessment at interventional centre     | Missing                                                     | 59 (32.4%)  |
|                                         | Assessed in A&E                                             | 68 (37.4%)  |
|                                         | Acute assessment unit                                       | 1 (0.5%)    |
|                                         | CCU / cardiac facility                                      | 26 (14.3%)  |

|                                          |                     |             |
|------------------------------------------|---------------------|-------------|
|                                          | Catheter laboratory | 28 (15.4%)  |
|                                          | Already in hospital | 0 (0.0%)    |
|                                          | Unknown             | 0 (0.0%)    |
| <b>NICOR PCI</b>                         |                     | <b>All</b>  |
| Cardiopulmonary resuscitation (CPR)      | Missing             | 29 (28.7%)  |
|                                          | No                  | 72 (71.3%)  |
|                                          | Yes                 | 0 (0.0%)    |
| Coronary artery bypass grafting (CABG)   | Missing             | 0 (0.0%)    |
|                                          | No                  | 101 (100%)  |
|                                          | Yes                 | 0 (0.0%)    |
| Ventilation                              | Missing             | 101 (100%)* |
|                                          | No                  | 0 (0.0%)    |
|                                          | Yes                 | 0 (0.0%)    |
| Hypothermia                              | Missing             | 101 (100%)* |
|                                          | No                  | 0 (0.0%)    |
|                                          | Yes                 | 0 (0.0%)    |
| Percutaneous coronary intervention (PCI) | Missing             | 101 (100%)  |
|                                          | No                  | 0 (0.0%)    |
|                                          | Yes                 | 0 (0.0%)    |
|                                          | No                  | 0 (0.0%)    |
|                                          | Yes                 | 0 (0.0%)    |

Note: \*: Variables were added to the dataset after the linkage was performed.

Supplementary Table 2: Summary of demographic and cardiac arrest event characteristics in trial patients with and without matched HES inpatient, Critical care and A&E data

|                                                  |                       | HES matched<br>N=2079 | HES unmatched<br>N=319 | p value |
|--------------------------------------------------|-----------------------|-----------------------|------------------------|---------|
| Age (year)                                       |                       | 73.6 (21.9)           | 71.8 (24.4)            | 0.151   |
| Sex                                              | Male                  | 1315 (63.3%)          | 215 (67.4%)            | 0.151   |
|                                                  | Female                | 764 (36.8%)           | 104 (32.6%)            |         |
| Initial aetiology                                | Presumed cardiac      | 1786 (85.9%)          | 272 (85.3%)            | 0.864   |
|                                                  | Respiratory           | 146 (7.0%)            | 27 (8.5%)              |         |
|                                                  | Submersion            | 8 (0.4%)              | 1 (0.3%)               |         |
|                                                  | Other                 | 74 (3.6%)             | 9 (2.8%)               |         |
|                                                  | Unknown               | 65 (3.1%)             | 10 (3.1%)              |         |
| Initial rhythm                                   | VF                    | 624 (30.0%)           | 99 (31.0%)             | 0.468   |
|                                                  | VT                    | 20 (1.0%)             | 1 (0.3%)               |         |
|                                                  | PEA                   | 613 (29.5%)           | 83 (26.0%)             |         |
|                                                  | Asystole              | 727 (35.0%)           | 118 (37.0%)            |         |
|                                                  | Unknown               | 95 (4.6%)             | 18 (5.6%)              |         |
| Location                                         | Home                  | 1610 (77.4%)          | 206 (64.6%)            | <0.001  |
|                                                  | Public place          | 333 (16.0%)           | 89 (27.9%)             |         |
|                                                  | Other                 | 136 (6.5%)            | 24 (7.5%)              |         |
| Witness                                          | Not witnessed         | 508 (24.5%)           | 60 (18.8%)             | 0.027   |
|                                                  | By bystander          | 961 (46.3%)           | 170 (53.3%)            |         |
|                                                  | By EMS                | 413 (19.9%)           | 60 (18.8%)             |         |
|                                                  | By Non-EMS healthcare | 64 (3.1%)             | 4 (1.3%)               |         |
|                                                  | Unknown               | 132 (6.4%)            | 25 (7.8%)              |         |
| Cardiopulmonary resuscitation (CPR) by Bystander | No                    | 1104 (53.1%)          | 156 (48.9%)            | 0.376   |
|                                                  | Yes                   | 862 (41.5%)           | 144 (45.1%)            |         |
|                                                  | Unknown               | 113 (5.4%)            | 19 (6.0%)              |         |
| Response time (minute)†                          |                       | 6.1 (4.3)             | 7.2 (5.1)              | <.0001  |
| Survival at 30days                               | Alive                 | 224 (10.8%)           | 38 (11.9%)             | 0.544   |
|                                                  | Deceased              | 1855 (89.2%)          | 281 (88.1%)            |         |
| ROSC at hospital transfer                        | ROSC                  | 790 (38.0%)           | 125 (39.2%)            | <0.001  |
|                                                  | CPR in progress       | 1204 (57.9%)          | 135 (42.3%)            |         |
|                                                  | Unknown               | 85 (4.1%)             | 59 (18.5%)             |         |
| EQ5d at 3 months                                 |                       | 70.0 (20.0)           | 75.0 (20.0)            | 0.970   |
| EQ5d at 12 months                                |                       | 80.0 (30.0)           | 72.5 (26.0)            | 0.368   |
| SF12 mental health at 3 months                   |                       | 50.4 (16.8)           | 45.4 (23.0)            | 0.690   |
| SF12 physical health at 3 months                 |                       | 40.8 (14.2)           | 44.1 (15.0)            | 0.533   |
| SF12 mental health at 12 months                  |                       | 51.0 (14.5)           | 44.1 (10.5)            | 0.118   |
| SF12 physical health at 12 months                |                       | 45.2 (17.4)           | 38.4 (13.9)            | 0.059   |
| HADS Anxiety at 12 months                        |                       | 5.0 (7.0)             | 6.5 (5.0)              | 0.112   |



|                              |             |             |       |
|------------------------------|-------------|-------------|-------|
| HADS depression at 12 months | 4.0 (5.0)   | 6.0 (4.5)   | 0.163 |
| MMSE at 12 months            | 29.0 (3.0)  | 29.0 (2.0)  | 0.648 |
| PTSD at 12 months            | 27.0 (17.0) | 33.0 (19.0) | 0.280 |

Note: Continuous variables were shown as median (Interquartile range) and categorical variables were shown as n (percentage). †: response time was from 999 call to EMS arrival at scene.

For peer review only

Supplementary Table 3: Summary of demographic and cardiac arrest event characteristics in patients with matched HES Critical care only, CMP only and both.

|                                     |                       | HES Critical Care only | ICNARC CMP only | Critical care & CMP | p value |
|-------------------------------------|-----------------------|------------------------|-----------------|---------------------|---------|
| Age (year)                          |                       | 68.3 (24.6)            | 64.8 (28.2)     | 65.5 (21.2)         | 0.684   |
| Sex                                 | Male                  | 36 (70.6%)             | 66 (63.5%)      | 208 (68.7%)         | 0.556   |
|                                     | Female                | 15 (29.4%)             | 38 (36.5%)      | 95 (31.4%)          |         |
| Aetiology                           | Presumed cardiac      | 45 (88.2%)             | 84 (80.8%)      | 247 (81.5%)         | 0.554   |
|                                     | Respiratory           | 1 (2.0%)               | 12 (11.5%)      | 25 (8.3%)           |         |
|                                     | Submersion            | 0 (0.0%)               | 1 (1.0%)        | 1 (0.3%)            |         |
|                                     | Other                 | 3 (5.9%)               | 6 (5.8%)        | 20 (6.6%)           |         |
|                                     | Unknown               | 2 (3.9%)               | 1 (1.0%)        | 10 (3.3%)           |         |
| Location                            | Home                  | 37 (72.6%)             | 68 (65.4%)      | 209 (69.0%)         | 0.516   |
|                                     | Public place          | 14 (27.5%)             | 30 (28.9%)      | 79 (26.1%)          |         |
|                                     | Other                 | 0 (0.0%)               | 6 (5.8%)        | 15 (5.0%)           |         |
| Witness                             | No                    | 11 (21.6%)             | 26 (25%)        | 69 (22.8%)          | 0.981   |
|                                     | By bystander          | 29 (56.9%)             | 59 (56.7%)      | 174 (57.4%)         |         |
|                                     | By EMS                | 7 (13.7%)              | 13 (12.5%)      | 32 (10.6%)          |         |
|                                     | By Non-EMS healthcare | 1 (2.0%)               | 2 (1.9%)        | 9 (3.0%)            |         |
|                                     | Unknown               | 3 (5.9%)               | 4 (3.9%)        | 19 (6.3%)           |         |
| Cardiopulmonary resuscitation       | No                    | 24 (47.1%)             | 45 (43.3%)      | 136 (44.9%)         | 0.802   |
|                                     | Yes                   | 24 (47.1%)             | 52 (50.0%)      | 155 (51.2%)         |         |
|                                     | Unknown               | 3 (5.9%)               | 7 (6.7%)        | 12 (4.0%)           |         |
| Rhythm                              | VF                    | 26 (51%)               | 44 (42.3%)      | 153 (50.5%)         | 0.437   |
|                                     | VT                    | 2 (3.9%)               | 1 (1.0%)        | 4 (1.3%)            |         |
|                                     | PEA                   | 10 (19.6%)             | 25 (24.0%)      | 55 (18.2%)          |         |
|                                     | Asystole              | 11 (21.6%)             | 26 (25.0%)      | 80 (26.4%)          |         |
|                                     | Unknown               | 2 (3.9%)               | 8 (7.7%)        | 11 (3.6%)           |         |
| Response time (minute) <sup>†</sup> |                       | 6.6 (4.4)              | 6.7 (4.7)       | 6.0 (3.9)           | 0.034   |
| Survival at 30days                  | Alive                 | 19 (37.3%)             | 31 (29.8%)      | 93 (30.7%)          | 0.606   |
|                                     | Deceased              | 32 (62.8%)             | 73 (70.2%)      | 210 (69.3%)         |         |
| ROSC at hospital transfer           | ROSC                  | 42 (82.4%)             | 79 (76%)        | 241 (79.5%)         | 0.294   |
|                                     | CPR in progress       | 7 (13.7%)              | 14 (13.5%)      | 47 (15.5%)          |         |
|                                     | Unknown               | 2 (3.9%)               | 11 (10.6%)      | 15 (5.0%)           |         |
| EQ5d at 3 months                    |                       | 67.5 (24.0)            | 75.5 (16.0)     | 70.0 (25.0)         | 0.838   |
| EQ5d at 12 months                   |                       | 80.0 (14.0)            | 74.0 (20.0)     | 80.0 (25.0)         | 0.298   |
| SF12 mental health at 3 months      |                       | 48.4 (11)              | 48.3 (19.3)     | 49.3 (16.5)         | 0.794   |
| SF12 physical health at 3 months    |                       | 38.9 (13.2)            | 39.2 (13)       | 41.1 (14.2)         | 0.836   |
| SF12 mental health at 12 months     |                       | 51.6 (8)               | 43 (14.3)       | 47.8 (15.2)         | 0.543   |
| SF12 physical health at 12 months   |                       | 42.9 (21)              | 38.8 (14.6)     | 46.7 (15.6)         | 0.235   |

|                              |            |             |             |       |
|------------------------------|------------|-------------|-------------|-------|
| HADS Anxiety at 12 months    | 5.0 (5.0)  | 9.5 (6.5)   | 6.0 (6.0)   | 0.078 |
| HADS depression at 12 months | 4.0 (3.0)  | 6.0 (5.5)   | 5.0 (8.0)   | 0.368 |
| MMSE at 12 months            | 28.0 (3.0) | 29.0 (3.0)  | 29.0 (3.0)  | 0.717 |
| PTSD at 12 months            | 30.0 (8.5) | 40.0 (23.0) | 29.0 (15.0) | 0.631 |

Note: Continuous variables were shown as median (Interquartile range) and categorical variables were shown as frequency (percentage). †: response time is from 999 call to EMS arrival at scene.

For peer review only

## STROBE Statement—checklist of items that should be included in reports of observational studies

|                              | Item No. | Recommendation                                                                                                                                                                             | Page No.         | Relevant text from manuscript |
|------------------------------|----------|--------------------------------------------------------------------------------------------------------------------------------------------------------------------------------------------|------------------|-------------------------------|
| <b>Title and abstract</b>    | 1        | (a) Indicate the study's design with a commonly used term in the title or the abstract                                                                                                     | 1                |                               |
|                              |          | (b) Provide in the abstract an informative and balanced summary of what was done and what was found                                                                                        | 3                |                               |
| <b>Introduction</b>          |          |                                                                                                                                                                                            |                  |                               |
| Background/rationale         | 2        | Explain the scientific background and rationale for the investigation being reported                                                                                                       | 5-6              |                               |
| Objectives                   | 3        | State specific objectives, including any prespecified hypotheses                                                                                                                           | 6                |                               |
| <b>Methods</b>               |          |                                                                                                                                                                                            |                  |                               |
| Study design                 | 4        | Present key elements of study design early in the paper                                                                                                                                    | 6                |                               |
| Setting                      | 5        | Describe the setting, locations, and relevant dates, including periods of recruitment, exposure, follow-up, and data collection                                                            | 6-7              |                               |
| Participants                 | 6        | (a) <i>Cohort study</i> —Give the eligibility criteria, and the sources and methods of selection of participants. Describe methods of follow-up                                            | 7                |                               |
|                              |          | <i>Case-control study</i> —Give the eligibility criteria, and the sources and methods of case ascertainment and control selection. Give the rationale for the choice of cases and controls |                  |                               |
|                              |          | <i>Cross-sectional study</i> —Give the eligibility criteria, and the sources and methods of selection of participants                                                                      |                  |                               |
|                              |          | (b) <i>Cohort study</i> —For matched studies, give matching criteria and number of exposed and unexposed                                                                                   | Not applicable   |                               |
|                              |          | <i>Case-control study</i> —For matched studies, give matching criteria and the number of controls per case                                                                                 |                  |                               |
| Variables                    | 7        | Clearly define all outcomes, exposures, predictors, potential confounders, and effect modifiers. Give diagnostic criteria, if applicable                                                   | 9                |                               |
| Data sources/<br>measurement | 8*       | For each variable of interest, give sources of data and details of methods of assessment (measurement). Describe comparability of assessment methods if there is more than one group       | 6-7              |                               |
| Bias                         | 9        | Describe any efforts to address potential sources of bias                                                                                                                                  | 8                |                               |
| Study size                   | 10       | Explain how the study size was arrived at                                                                                                                                                  | 6, 10 (figure 1) |                               |

Continued on next page

|                        |     |                                                                                                                                                                                                                    |                                |
|------------------------|-----|--------------------------------------------------------------------------------------------------------------------------------------------------------------------------------------------------------------------|--------------------------------|
| Quantitative variables | 11  | Explain how quantitative variables were handled in the analyses. If applicable, describe which groupings were chosen and why                                                                                       | 9                              |
| Statistical methods    | 12  | (a) Describe all statistical methods, including those used to control for confounding                                                                                                                              | 9                              |
|                        |     | (b) Describe any methods used to examine subgroups and interactions                                                                                                                                                | Not applicable                 |
|                        |     | (c) Explain how missing data were addressed                                                                                                                                                                        | Not applicable                 |
|                        |     | (d) <i>Cohort study</i> —If applicable, explain how loss to follow-up was addressed                                                                                                                                | Not applicable                 |
|                        |     | <i>Case-control study</i> —If applicable, explain how matching of cases and controls was addressed<br><i>Cross-sectional study</i> —If applicable, describe analytical methods taking account of sampling strategy | Not applicable                 |
|                        |     | (e) Describe any sensitivity analyses                                                                                                                                                                              | Not applicable                 |
| <b>Results</b>         |     |                                                                                                                                                                                                                    |                                |
| Participants           | 13* | (a) Report numbers of individuals at each stage of study—eg numbers potentially eligible, examined for eligibility, confirmed eligible, included in the study, completing follow-up, and analysed                  | 6-7                            |
|                        |     | (b) Give reasons for non-participation at each stage                                                                                                                                                               | Not applicable                 |
|                        |     | (c) Consider use of a flow diagram                                                                                                                                                                                 | 10 (figure 1)                  |
| Descriptive data       | 14* | (a) Give characteristics of study participants (eg demographic, clinical, social) and information on exposures and potential confounders                                                                           | Supplementary table 2          |
|                        |     | (b) Indicate number of participants with missing data for each variable of interest                                                                                                                                | Supplementary table 1&2        |
|                        |     | (c) <i>Cohort study</i> —Summarise follow-up time (eg, average and total amount)                                                                                                                                   | Not applicable                 |
| Outcome data           | 15* | <i>Cohort study</i> —Report numbers of outcome events or summary measures over time                                                                                                                                | Not applicable                 |
|                        |     | <i>Case-control study</i> —Report numbers in each exposure category, or summary measures of exposure                                                                                                               | Not applicable                 |
|                        |     | <i>Cross-sectional study</i> —Report numbers of outcome events or summary measures                                                                                                                                 | 10-11                          |
| Main results           | 16  | (a) Give unadjusted estimates and, if applicable, confounder-adjusted estimates and their precision (eg, 95% confidence interval). Make clear which confounders were adjusted for and why they were included       | 10-11, Supplementary table 1-3 |
|                        |     | (b) Report category boundaries when continuous variables were categorized                                                                                                                                          | Not applicable                 |
|                        |     | (c) If relevant, consider translating estimates of relative risk into absolute risk for a meaningful time period                                                                                                   | Not applicable                 |

Continued on next page

|                          |    |                                                                                                                                                                            |                |
|--------------------------|----|----------------------------------------------------------------------------------------------------------------------------------------------------------------------------|----------------|
| Other analyses           | 17 | Report other analyses done—eg analyses of subgroups and interactions, and sensitivity analyses                                                                             | Not applicable |
| <b>Discussion</b>        |    |                                                                                                                                                                            |                |
| Key results              | 18 | Summarise key results with reference to study objectives                                                                                                                   | 11-12          |
| Limitations              | 19 | Discuss limitations of the study, taking into account sources of potential bias or imprecision. Discuss both direction and magnitude of any potential bias                 | 4, 13          |
| Interpretation           | 20 | Give a cautious overall interpretation of results considering objectives, limitations, multiplicity of analyses, results from similar studies, and other relevant evidence | 11-14          |
| Generalisability         | 21 | Discuss the generalisability (external validity) of the study results                                                                                                      | 13-14          |
| <b>Other information</b> |    |                                                                                                                                                                            |                |
| Funding                  | 22 | Give the source of funding and the role of the funders for the present study and, if applicable, for the original study on which the present article is based              | 15             |

\*Give information separately for cases and controls in case-control studies and, if applicable, for exposed and unexposed groups in cohort and cross-sectional studies.

1  
2  
3  
4  
5  
6  
7  
8  
9  
10  
11  
12  
13  
14  
15  
16  
17  
18  
19  
20  
21  
22  
23  
24  
25  
26  
27  
28  
29  
30  
31  
32  
33  
34  
35  
36  
37  
38  
39  
40  
41  
42  
43  
44  
45  
46  
47
