# Supplementary material for: Feasibility of data linkage in the PARAMEDIC trial: a cluster randomised trial of mechanical chest compression in out-of-hospital cardiac arrest
Source: PubMed Central journal article supplement (PMC6067361; doi:10.1136/bmjopen-2018-021519), 2018-07-28
Supplement: bmjopen-2018-021519supp001.pdf [file bmjopen-2018-021519supp001.pdf]

## Supplementary materials:

Supplementary Table 1: Summary of retrieved information in each linked dataset.

| HES Inpatient            |                                                                                                                       | All         |
|--------------------------|-----------------------------------------------------------------------------------------------------------------------|-------------|
| CSK operation            | No                                                                                                                    | 606 (79.6%) |
|                          | Yes                                                                                                                   | 155 (20.4%) |
| Destination of discharge | The usual place of residence, including no fixed abode                                                                | 192 (24.9%) |
|                          | Temporary place of residence when usually resident elsewhere                                                          | 4 (0.5%)    |
|                          | Repatriation from high security psychiatric hospital (from 1999-2000)                                                 | 0 (0.0%)    |
|                          | Repatriation from high security psychiatric hospital (from 1999-2000)                                                 | 0 (0.0%)    |
|                          | Penal establishment - court (from 1999-2000)                                                                          | 0 (0.0%)    |
|                          | Penal establishment - police station (from 1999-2000)                                                                 | 0 (0.0%)    |
|                          | Penal establishment - court and police station excluded (from 1999-2000 to 2006-07)                                   | 0 (0.0%)    |
|                          | High security psychiatric hospital, Scotland (from 1999-2000)                                                         | 0 (0.0%)    |
|                          | NHS other hospital provider - high security psychiatric accommodation                                                 | 0 (0.0%)    |
|                          | NHS other hospital provider - medium secure unit (from 1999-2000)                                                     | 32 (4.2%)   |
|                          | NHS other hospital provider - ward for maternity patients or neonates                                                 | 0 (0.0%)    |
|                          | NHS other hospital provider - ward for patients who are mentally ill or have learning disabilities                    | 0 (0.0%)    |
|                          | NHS run nursing home, residential care home or group home                                                             | 3 (0.4%)    |
|                          | Local authority Part 3 residential accommodation - where care is provided (from 1996-97)                              | 0 (0.0%)    |
|                          | Local authority foster care, but not in Part 3 residential accommodation - where care is provided (from 1996-97)      | 0 (0.0%)    |
|                          | LA home or care (1989-90 to 1995-96)                                                                                  | 0 (0.0%)    |
|                          | Non-NHS run hospital - medium secure unit (from 2003-04)                                                              | 1 (0.1%)    |
|                          | Non-NHS (other than local authority) run residential care home (from 1996-97 to 2003-04) and care home (from 2003-04) | 3 (0.4%)    |
|                          | Non-NHS (other than local authority) run nursing home (from 1996-97 to 2003-04)                                       | 0 (0.0%)    |
|                          | Non-NHS run hospital                                                                                                  | 0 (0.0%)    |
|                          | Non-NHS (other than local authority) run hospice                                                                      | 2 (0.3%)    |
|                          | Non-NHS institution (1989-90 to 1995-96)                                                                              | 0 (0.0%)    |
|                          | Not applicable                                                                                                        | 7 (0.9%)    |
|                          | Not known                                                                                                             | 1 (0.1%)    |
| Died                     | 522 (67.7%)                                                                                                           |             |
| Method of discharge      | Discharged on clinical advice or with clinical consent                                                                | 234 (30.4%) |
|                          | Self discharged, or discharged by a relative or advocate                                                              | 5 (0.6%)    |

|                                    |                                                                                     |              |
|------------------------------------|-------------------------------------------------------------------------------------|--------------|
|                                    | Discharged by a mental health review tribunal, the Home Secretary or a court        | 0 (0.0%)     |
|                                    | Baby was still born                                                                 | 0 (0.0%)     |
|                                    | Not applicable: patient still in hospital                                           | 10 (1.3%)    |
|                                    | Not known: a validation error                                                       | 0 (0.0%)     |
|                                    | Died                                                                                | 522 (67.7%)  |
| IMD 2004 index                     | Missing                                                                             | 84 (10.9%)   |
|                                    | Least deprived 10%                                                                  | 64 (8.3%)    |
|                                    | Less deprived 10-20%                                                                | 43 (5.6%)    |
|                                    | Less deprived 20-30%                                                                | 47 (6.1%)    |
|                                    | Less deprived 30-40%                                                                | 35 (4.5%)    |
|                                    | Less deprived 40-50%                                                                | 50 (6.5%)    |
|                                    | More deprived 10-20%                                                                | 80 (10.4%)   |
|                                    | More deprived 20-30%                                                                | 84 (10.9%)   |
|                                    | More deprived 30-40%                                                                | 58 (7.5%)    |
|                                    | More deprived 40-50%                                                                | 61 (7.9%)    |
|                                    | Most deprived 10%                                                                   | 165 (21.4%)  |
| Hospital length of stay*           |                                                                                     | 7.7 (20.3)   |
| <b>HES A&amp;E</b>                 |                                                                                     | <b>All</b>   |
| A&E department type - A&E only     | Emergency departments                                                               | 1865 (96.8%) |
|                                    | Consultant-led mono specialty accident and emergency service'                       | 0 (0.0%)     |
|                                    | Other type of A&E. Excludes NHS walk-in centres                                     | 4 (0.2%)     |
|                                    | NHS walk-in centres                                                                 | 1 (0.1%)     |
|                                    | Not known                                                                           | 57 (3.0%)    |
| A&E attendance disposal - A&E only | Admitted to hospital bed / became a lodged patient of the same health care provider | 560 (29.1%)  |
|                                    | Discharged – follow-up treatment to be provided by general practitioner             | 5 (0.3%)     |
|                                    | Discharged – did not require any follow-up treatment                                | 9 (0.5%)     |
|                                    | Referred to A&E clinic                                                              | 13 (0.7%)    |
|                                    | Referred to fracture clinic                                                         | 1 (0.1%)     |
|                                    | Referred to other outpatient clinic                                                 | 1 (0.1%)     |
|                                    | Transferred to other healthcare provider                                            | 28 (1.5%)    |
|                                    | Referred to other healthcare professional                                           | 6 (0.3%)     |
|                                    | Left department before being treated                                                | 1 (0.1%)     |
|                                    | Left department having refused treatment                                            | 0 (0.0%)     |
|                                    | Other                                                                               | 5 (0.3%)     |
|                                    | Not known                                                                           | 2 (0.1%)     |
|                                    | Died in department                                                                  | 1296 (67.3%) |
| IMD 2004 index                     | Missing                                                                             | 7 (0.4%)     |
|                                    | Least deprived 10%                                                                  | 126 (6.5%)   |
|                                    | Less deprived 10-20%                                                                | 95 (4.9%)    |
|                                    | Less deprived 20-30%                                                                | 139 (7.2%)   |
|                                    | Less deprived 30-40%                                                                | 120 (6.2%)   |

|                                                                           |                                    |             |
|---------------------------------------------------------------------------|------------------------------------|-------------|
|                                                                           | Less deprived 40-50%               | 133 (6.9%)  |
|                                                                           | More deprived 10-20%               | 257 (13.3%) |
|                                                                           | More deprived 20-30%               | 213 (11.1%) |
|                                                                           | More deprived 30-40%               | 173 (9.0%)  |
|                                                                           | More deprived 40-50%               | 205 (10.6%) |
|                                                                           | Most deprived 10%                  | 459 (23.8%) |
| <b>HES Critical care</b>                                                  |                                    | <b>All</b>  |
| Length of level 2 CC days                                                 |                                    | 0.9 (1.7)   |
| Length of level 3 CC days                                                 |                                    | 4.4 (5.4)   |
| Total length of CC days                                                   |                                    | 6.6 (15.4)  |
| <b>ICNARC CMP</b>                                                         |                                    | <b>All</b>  |
| Length of level 0 ITU days                                                |                                    | 0 (0.3)     |
| Length of level 1 ITU days                                                |                                    | 0.1 (0.6)   |
| Length of level 2 ITU days                                                |                                    | 1.1 (4.0)   |
| Length of level 3 ITU days                                                |                                    | 5.2 (9.4)   |
| Total length of ITU days                                                  |                                    | 6.5 (12.9)  |
| Total length of ITU days in 30 days survived patients                     |                                    | 10.5 (22.0) |
| Total length of ITU days in 30 days deceased patients                     |                                    | 4.8 (4.5)   |
| Days of alive and free of ITU stay in the first 28 days of cardiac arrest |                                    | 6.9 (10.3)  |
| Treatment withheld/withdrawn                                              | Both withheld then withdrawn       | 23 (5.7%)   |
|                                                                           | Withheld                           | 4 (1.0%)    |
|                                                                           | Withdrawn                          | 133 (32.7%) |
|                                                                           | Neither                            | 247 (60.7%) |
| Organ donation                                                            | Heartbeating solid organ donor     | 13 (3.2%)   |
|                                                                           | No solid organs or tissues donated | 199 (48.9%) |
|                                                                           | Non-heartbeating solid organ donor | 15 (3.7%)   |
|                                                                           | Tissue donor only                  | 8 (2.0%)    |
| <b>NICOR MINAP</b>                                                        |                                    | <b>All</b>  |
| Admission Diagnosis                                                       | Definite myocardial infarction     | 126 (69.2%) |
|                                                                           | Acute coronary syndrome            | 30 (16.5%)  |
|                                                                           | Chest pain cause                   | 4 (2.2%)    |
|                                                                           | Other initial diagnosis            | 22 (12.1%)  |
| Admission Ward                                                            | Missing                            | 1 (0.5%)    |
|                                                                           | Cardiac care unit                  | 94 (51.6%)  |
|                                                                           | Acute admissions unit              | 6 (3.3%)    |
|                                                                           | General medical ward               | 1 (0.5%)    |
|                                                                           | Intensive therapy unit             | 69 (37.9%)  |
|                                                                           | Other                              | 9 (4.9%)    |
|                                                                           | Cardiac ward (non CCU)             | 1 (0.5%)    |
|                                                                           | Stepdown ward                      | 0 (0.0%)    |
|                                                                           | Unknown                            | 0 (0.0%)    |
| Died in A&E                                                               | 1 (0.5%)                           |             |

|                                         |                                                             |             |
|-----------------------------------------|-------------------------------------------------------------|-------------|
| Initial Reperfusion Treatment           | Missing                                                     | 3 (2.2%)    |
|                                         | None                                                        | 18 (13.1%)  |
|                                         | Thrombolytic treatment                                      | 0 (0.0%)    |
|                                         | pPCI in house                                               | 116 (84.7%) |
|                                         | Referred for consideration for pPCI elsewhere               | 0 (0.0%)*   |
|                                         | Unknown                                                     | 0 (0.0%)    |
| Procedure performed                     | Missing                                                     | 30(21.9%)   |
|                                         | No angiogram                                                | 2 (1.5%)    |
|                                         | Angiogram but no PCI                                        | 9 (6.6%)    |
|                                         | Angiogram and PCI                                           | 96 (70.1%)  |
|                                         | Unknown                                                     | 0 (0.0%)    |
| Coronary angiography                    | Missing                                                     | 1(2.9%)     |
|                                         | Protocol driven investigation performed in this hospital    | 12(35.3%)   |
|                                         | Symptom driven investigation performed in this hospital     | 7 (20.6%)   |
|                                         | Protocol driven investigation performed at another hospital | 0 (0.0%)    |
|                                         | Symptom driven investigation performed at another hospital  | 0 (0.0%)    |
|                                         | Planned after discharge                                     | 0 (0.0%)    |
|                                         | Not applicable                                              | 9 (6.6%)    |
|                                         | Patient refused                                             | 1 (2.9%)    |
|                                         | Not performed                                               | 5 (14.7%)   |
|                                         | Unknown                                                     | 0 (0.0%)    |
| Coronary intervention                   | Missing                                                     | 6 (17.6%)   |
|                                         | Percutaneous coronary intervention                          | 9 (26.5%)   |
|                                         | CABG                                                        | 0 (0.0%)    |
|                                         | PCI planned after discharge                                 | 0 (0.0%)    |
|                                         | CABG planned after discharge                                | 1(2.9%)     |
|                                         | Not applicable                                              | 5 (14.7%)   |
|                                         | Patient refused                                             | 1 (2.9%)    |
|                                         | Not performed or arranged                                   | 11 (32.4%)  |
|                                         | Unknown                                                     | 0 (0.0%)    |
| Assessment at non-interventional centre | Missing                                                     | 5 (2.7%)    |
|                                         | No contact with a non interventional hospital               | 126 (69.2%) |
|                                         | Patient remains in ambulance                                | 0 (0.0%)    |
|                                         | A&E                                                         | 30 (16.5%)  |
|                                         | Acute assessment unit                                       | 2 (1.1%)    |
|                                         | CCU / cardiac facility                                      | 1 (0.5%)    |
|                                         | Self referral                                               | 0 (0.0%)    |
|                                         | Already in hospital                                         | 2 (1.1%)    |
|                                         | Other                                                       | 0 (0.0%)    |
|                                         | Unknown                                                     | 16 (8.8%)   |
| Assessment at interventional centre     | Missing                                                     | 59 (32.4%)  |
|                                         | Assessed in A&E                                             | 68 (37.4%)  |
|                                         | Acute assessment unit                                       | 1 (0.5%)    |
|                                         | CCU / cardiac facility                                      | 26 (14.3%)  |

|                                          |                     |             |
|------------------------------------------|---------------------|-------------|
|                                          | Catheter laboratory | 28 (15.4%)  |
|                                          | Already in hospital | 0 (0.0%)    |
|                                          | Unknown             | 0 (0.0%)    |
| <b>NICOR PCI</b>                         |                     | <b>All</b>  |
| Cardiopulmonary resuscitation (CPR)      | Missing             | 29 (28.7%)  |
|                                          | No                  | 72 (71.3%)  |
|                                          | Yes                 | 0 (0.0%)    |
| Coronary artery bypass grafting (CABG)   | Missing             | 0 (0.0%)    |
|                                          | No                  | 101 (100%)  |
|                                          | Yes                 | 0 (0.0%)    |
| Ventilation                              | Missing             | 101 (100%)* |
|                                          | No                  | 0 (0.0%)    |
|                                          | Yes                 | 0 (0.0%)    |
| Hypothermia                              | Missing             | 101 (100%)* |
|                                          | No                  | 0 (0.0%)    |
|                                          | Yes                 | 0 (0.0%)    |
| Percutaneous coronary intervention (PCI) | Missing             | 101 (100%)  |
|                                          | No                  | 0 (0.0%)    |
|                                          | Yes                 | 0 (0.0%)    |
|                                          | No                  | 0 (0.0%)    |
|                                          | Yes                 | 0 (0.0%)    |

Note: \*: Variables were added to the dataset after the linkage was performed.

Supplementary Table 2: Summary of demographic and cardiac arrest event characteristics in trial patients with and without matched HES inpatient, Critical care and A&E data

|                                                  |                       | HES matched<br>N=2079 | HES unmatched<br>N=319 | p value |
|--------------------------------------------------|-----------------------|-----------------------|------------------------|---------|
| Age (year)                                       |                       | 73.6 (21.9)           | 71.8 (24.4)            | 0.151   |
| Sex                                              | Male                  | 1315 (63.3%)          | 215 (67.4%)            | 0.151   |
|                                                  | Female                | 764 (36.8%)           | 104 (32.6%)            |         |
| Initial aetiology                                | Presumed cardiac      | 1786 (85.9%)          | 272 (85.3%)            | 0.864   |
|                                                  | Respiratory           | 146 (7.0%)            | 27 (8.5%)              |         |
|                                                  | Submersion            | 8 (0.4%)              | 1 (0.3%)               |         |
|                                                  | Other                 | 74 (3.6%)             | 9 (2.8%)               |         |
|                                                  | Unknown               | 65 (3.1%)             | 10 (3.1%)              |         |
| Initial rhythm                                   | VF                    | 624 (30.0%)           | 99 (31.0%)             | 0.468   |
|                                                  | VT                    | 20 (1.0%)             | 1 (0.3%)               |         |
|                                                  | PEA                   | 613 (29.5%)           | 83 (26.0%)             |         |
|                                                  | Asystole              | 727 (35.0%)           | 118 (37.0%)            |         |
|                                                  | Unknown               | 95 (4.6%)             | 18 (5.6%)              |         |
| Location                                         | Home                  | 1610 (77.4%)          | 206 (64.6%)            | <0.001  |
|                                                  | Public place          | 333 (16.0%)           | 89 (27.9%)             |         |
|                                                  | Other                 | 136 (6.5%)            | 24 (7.5%)              |         |
| Witness                                          | Not witnessed         | 508 (24.5%)           | 60 (18.8%)             | 0.027   |
|                                                  | By bystander          | 961 (46.3%)           | 170 (53.3%)            |         |
|                                                  | By EMS                | 413 (19.9%)           | 60 (18.8%)             |         |
|                                                  | By Non-EMS healthcare | 64 (3.1%)             | 4 (1.3%)               |         |
|                                                  | Unknown               | 132 (6.4%)            | 25 (7.8%)              |         |
| Cardiopulmonary resuscitation (CPR) by Bystander | No                    | 1104 (53.1%)          | 156 (48.9%)            | 0.376   |
|                                                  | Yes                   | 862 (41.5%)           | 144 (45.1%)            |         |
|                                                  | Unknown               | 113 (5.4%)            | 19 (6.0%)              |         |
| Response time (minute)†                          |                       | 6.1 (4.3)             | 7.2 (5.1)              | <.0001  |
| Survival at 30days                               | Alive                 | 224 (10.8%)           | 38 (11.9%)             | 0.544   |
|                                                  | Deceased              | 1855 (89.2%)          | 281 (88.1%)            |         |
| ROSC at hospital transfer                        | ROSC                  | 790 (38.0%)           | 125 (39.2%)            | <0.001  |
|                                                  | CPR in progress       | 1204 (57.9%)          | 135 (42.3%)            |         |
|                                                  | Unknown               | 85 (4.1%)             | 59 (18.5%)             |         |
| EQ5d at 3 months                                 |                       | 70.0 (20.0)           | 75.0 (20.0)            | 0.970   |
| EQ5d at 12 months                                |                       | 80.0 (30.0)           | 72.5 (26.0)            | 0.368   |
| SF12 mental health at 3 months                   |                       | 50.4 (16.8)           | 45.4 (23.0)            | 0.690   |
| SF12 physical health at 3 months                 |                       | 40.8 (14.2)           | 44.1 (15.0)            | 0.533   |
| SF12 mental health at 12 months                  |                       | 51.0 (14.5)           | 44.1 (10.5)            | 0.118   |
| SF12 physical health at 12 months                |                       | 45.2 (17.4)           | 38.4 (13.9)            | 0.059   |
| HADS Anxiety at 12 months                        |                       | 5.0 (7.0)             | 6.5 (5.0)              | 0.112   |

|                              |             |             |       |
|------------------------------|-------------|-------------|-------|
| HADS depression at 12 months | 4.0 (5.0)   | 6.0 (4.5)   | 0.163 |
| MMSE at 12 months            | 29.0 (3.0)  | 29.0 (2.0)  | 0.648 |
| PTSD at 12 months            | 27.0 (17.0) | 33.0 (19.0) | 0.280 |

Note: Continuous variables were shown as median (Interquartile range) and categorical variables were shown as n (percentage). †: response time was from 999 call to EMS arrival at scene.

Supplementary Table 3: Summary of demographic and cardiac arrest event characteristics in patients with matched HES Critical care only, CMP only and both.

|                                     |                       | HES Critical Care only | ICNARC CMP only | Critical care & CMP | p value |
|-------------------------------------|-----------------------|------------------------|-----------------|---------------------|---------|
| Age (year)                          |                       | 68.3 (24.6)            | 64.8 (28.2)     | 65.5 (21.2)         | 0.684   |
| Sex                                 | Male                  | 36 (70.6%)             | 66 (63.5%)      | 208 (68.7%)         | 0.556   |
|                                     | Female                | 15 (29.4%)             | 38 (36.5%)      | 95 (31.4%)          |         |
| Aetiology                           | Presumed cardiac      | 45 (88.2%)             | 84 (80.8%)      | 247 (81.5%)         | 0.554   |
|                                     | Respiratory           | 1 (2.0%)               | 12 (11.5%)      | 25 (8.3%)           |         |
|                                     | Submersion            | 0 (0.0%)               | 1 (1.0%)        | 1 (0.3%)            |         |
|                                     | Other                 | 3 (5.9%)               | 6 (5.8%)        | 20 (6.6%)           |         |
|                                     | Unknown               | 2 (3.9%)               | 1 (1.0%)        | 10 (3.3%)           |         |
| Location                            | Home                  | 37 (72.6%)             | 68 (65.4%)      | 209 (69.0%)         | 0.516   |
|                                     | Public place          | 14 (27.5%)             | 30 (28.9%)      | 79 (26.1%)          |         |
|                                     | Other                 | 0 (0.0%)               | 6 (5.8%)        | 15 (5.0%)           |         |
| Witness                             | No                    | 11 (21.6%)             | 26 (25%)        | 69 (22.8%)          | 0.981   |
|                                     | By bystander          | 29 (56.9%)             | 59 (56.7%)      | 174 (57.4%)         |         |
|                                     | By EMS                | 7 (13.7%)              | 13 (12.5%)      | 32 (10.6%)          |         |
|                                     | By Non-EMS healthcare | 1 (2.0%)               | 2 (1.9%)        | 9 (3.0%)            |         |
|                                     | Unknown               | 3 (5.9%)               | 4 (3.9%)        | 19 (6.3%)           |         |
| Cardiopulmonary resuscitation       | No                    | 24 (47.1%)             | 45 (43.3%)      | 136 (44.9%)         | 0.802   |
|                                     | Yes                   | 24 (47.1%)             | 52 (50.0%)      | 155 (51.2%)         |         |
|                                     | Unknown               | 3 (5.9%)               | 7 (6.7%)        | 12 (4.0%)           |         |
| Rhythm                              | VF                    | 26 (51%)               | 44 (42.3%)      | 153 (50.5%)         | 0.437   |
|                                     | VT                    | 2 (3.9%)               | 1 (1.0%)        | 4 (1.3%)            |         |
|                                     | PEA                   | 10 (19.6%)             | 25 (24.0%)      | 55 (18.2%)          |         |
|                                     | Asystole              | 11 (21.6%)             | 26 (25.0%)      | 80 (26.4%)          |         |
|                                     | Unknown               | 2 (3.9%)               | 8 (7.7%)        | 11 (3.6%)           |         |
| Response time (minute) <sup>†</sup> |                       | 6.6 (4.4)              | 6.7 (4.7)       | 6.0 (3.9)           | 0.034   |
| Survival at 30days                  | Alive                 | 19 (37.3%)             | 31 (29.8%)      | 93 (30.7%)          | 0.606   |
|                                     | Deceased              | 32 (62.8%)             | 73 (70.2%)      | 210 (69.3%)         |         |
| ROSC at hospital transfer           | ROSC                  | 42 (82.4%)             | 79 (76%)        | 241 (79.5%)         | 0.294   |
|                                     | CPR in progress       | 7 (13.7%)              | 14 (13.5%)      | 47 (15.5%)          |         |
|                                     | Unknown               | 2 (3.9%)               | 11 (10.6%)      | 15 (5.0%)           |         |
| EQ5d at 3 months                    |                       | 67.5 (24.0)            | 75.5 (16.0)     | 70.0 (25.0)         | 0.838   |
| EQ5d at 12 months                   |                       | 80.0 (14.0)            | 74.0 (20.0)     | 80.0 (25.0)         | 0.298   |
| SF12 mental health at 3 months      |                       | 48.4 (11)              | 48.3 (19.3)     | 49.3 (16.5)         | 0.794   |
| SF12 physical health at 3 months    |                       | 38.9 (13.2)            | 39.2 (13)       | 41.1 (14.2)         | 0.836   |
| SF12 mental health at 12 months     |                       | 51.6 (8)               | 43 (14.3)       | 47.8 (15.2)         | 0.543   |
| SF12 physical health at 12 months   |                       | 42.9 (21)              | 38.8 (14.6)     | 46.7 (15.6)         | 0.235   |



|                              |            |             |             |       |
|------------------------------|------------|-------------|-------------|-------|
| HADS Anxiety at 12 months    | 5.0 (5.0)  | 9.5 (6.5)   | 6.0 (6.0)   | 0.078 |
| HADS depression at 12 months | 4.0 (3.0)  | 6.0 (5.5)   | 5.0 (8.0)   | 0.368 |
| MMSE at 12 months            | 28.0 (3.0) | 29.0 (3.0)  | 29.0 (3.0)  | 0.717 |
| PTSD at 12 months            | 30.0 (8.5) | 40.0 (23.0) | 29.0 (15.0) | 0.631 |

Note: Continuous variables were shown as median (Interquartile range) and categorical variables were shown as frequency (percentage). †: response time is from 999 call to EMS arrival at scene.
